24 **Abstract**

25

26 Adiponectin-mediated pathways contribute to mammalian homeostasis; however,  
27 little is known about adiponectin and adiponectin receptor signaling in arthropods. In this  
28 study, we demonstrate that *Ixodes scapularis* ticks have an adiponectin receptor-like  
29 protein (ISARL) but lack adiponectin – suggesting activation by alternative pathways.  
30 *ISARL* expression is significantly upregulated in the tick gut after *Borrelia burgdorferi*  
31 infection suggesting that ISARL-signaling may be co-opted by the Lyme disease agent.  
32 Consistent with this, RNA interference (RNAi)-mediated silencing of *ISARL* significantly  
33 reduced the *B. burgdorferi* burden in the tick. RNA-seq-based transcriptomics and RNAi  
34 assays demonstrate that ISARL-mediated phospholipid metabolism by  
35 phosphatidylserine synthase I is associated with *B. burgdorferi* survival. Furthermore, the  
36 tick complement C1q-like protein 3 interacts with ISARL, and *B. burgdorferi* facilitates this  
37 process. This study identifies a new tick metabolic pathway that is connected to the life  
38 cycle of the Lyme disease spirochete.

39

40 **Keywords:** Adiponectin receptor; *Ixodes scapularis*; *Borrelia burgdorferi*; Phospholipid  
41 metabolism; C1q-like protein 3 protein

42

43 **Significance Statement**

44

45         Adiponectin binds to adiponectin receptors and participates in glucose and lipid  
46 metabolism in mammals. In this study, we found that ticks have an adiponectin receptor-  
47 like protein but lack adiponectin. Importantly, we demonstrated that the Lyme disease  
48 agent, *Borrelia burgdorferi*, takes advantage of the adiponectin receptor signaling  
49 pathway to establish infection in its arthropod vector, *Ixodes scapularis*. Our study sheds  
50 light on the understanding of *Borrelia*-tick interactions and provides insights into how a  
51 human infectious disease agent may evolve to manipulate host metabolism for its own  
52 benefits. Understanding this pathway may lead to new ways to interfere with the *Borrelia*  
53 life cycle, and this mechanism may be applicable to additional microbes that are  
54 transmitted by ticks, mosquitoes or other arthropods.

55

## 56 **Introduction**

57

58           Adiponectin, adipocyte complement related protein of 30 kDa (or Acrp30), plays  
59 important roles in the regulation of metabolism, insulin sensitivity, and inflammation  
60 across species (Kadowaki et al., 2006; Ouchi and Walsh, 2007; Yamauchi et al., 2002).  
61 Adiponectin mediates its actions mainly via binding adiponectin receptors with its globular  
62 C1q domain (Buechler et al., 2010; Yamauchi et al., 2002). Two adiponectin receptors,  
63 AdipoR1 and AdipoR2, have been identified in mammals (Yamauchi et al., 2003).  
64 AdipoR1 and R2 belong to a family of membrane receptors predicted to contain seven  
65 transmembrane domains with an internal N terminus and an external C terminus  
66 (Yamauchi et al., 2003). AdipoR1 has a higher binding affinity for the globular form of  
67 adiponectin, whereas AdipoR2 has a greater affinity for full length adiponectin (Yamauchi  
68 et al., 2003). Interestingly, AdipoR1 and AdipoR2 double-knockout mice have increased  
69 triglyceride levels, and exhibit insulin resistance, demonstrating that AdipoR1 and  
70 AdipoR2 regulate lipid and glucose homeostasis (Kadowaki et al., 2006; Yamauchi et al.,  
71 2007). In yeast, a homolog of mammalian adiponectin receptors, ORE20/PHO36, is  
72 involved in lipid and phosphate metabolism (Karpichev et al., 2002). PHO36, can also  
73 interact with a plant protein, osmotin, a homolog of mammalian adiponectin, thereby  
74 controlling apoptosis in yeast (Narasimhan et al., 2005). Adiponectin and adiponectin  
75 receptors in disease-transmitting arthropods have not been characterized. By utilizing the  
76 amino acid sequence homology search in other model arthropods, adiponectin was not  
77 identified from *Drosophila melanogaster*, however, an adiponectin receptor which  
78 regulates insulin secretion and controls glucose and lipid metabolism was characterized

79 (Kwak et al., 2013). In addition, Zhu et al. (2008) cloned an adiponectin-like receptor gene  
80 from the silk moth, *Bombyx mori*, and found that infection with *B. mori*  
81 nucleopolyhedrovirus significantly increased adiponectin receptor mRNA levels in the  
82 midgut of susceptible *B. mori*, suggesting an association with pathogen infectivity.

83

84 *Ixodes scapularis*, the black-legged tick, is an important vector of the Lyme disease  
85 agent, *Borrelia burgdorferi* (Estrada-Peña and Jongejan, 1999), which causes  
86 approximately 300,000 cases annually in the United States (Rosenberg et al., 2018). *B.*  
87 *burgdorferi* is acquired when larval or nymphal ticks feed on infected animals, and is  
88 transmitted by nymphs or adults to vertebrate hosts (Kurokawa et al., 2020). Lyme  
89 disease in humans manifests as a multisystem disorder of the skin and other organs (e.g.,  
90 joints, heart, and nervous system), resulting in patients experiencing cardiac, neurological,  
91 and arthritic complications (Asch et al., 1994; Singh and Girschick, 2004). A human  
92 vaccine against Lyme disease was approved by the FDA but is not currently available  
93 (Steere et al., 1998). Targeting tick proteins has the potential to disrupt tick feeding and  
94 alter *B. burgdorferi* colonization or transmission (Kurokawa et al., 2020), thereby offering  
95 a new way to interfere with the life cycle of the Lyme disease spirochete.

96

97 In the present study, we demonstrate that an *I. scapularis* adiponectin receptor-  
98 like (ISARL) protein facilitates *B. burgdorferi* colonization of the tick. ISARL-mediated  
99 stimulation of *I. scapularis* metabolic pathways are associated with spirochete  
100 colonization, and a tick complement C1q-like protein 3 contributes to ISARL activation.

101

## 102 **Results**

103

### 104 **Identification and characterization of an *I. scapularis* adiponectin receptor-like** 105 **protein**

106

107       As tick metabolism changes during pathogen colonization, and adiponectin-  
108 associated pathways mediate diverse metabolic activities, we examined the *I. scapularis*  
109 database for two of the prominent genes linked to this pathway. The available *I. scapularis*  
110 database (taxid:6945) in NCBI was searched with the genes for mammalian adiponectin  
111 and adiponectin receptors, and results with the human and mouse genes are shown.  
112 There were no tick genes with high homology to the genes for human and mouse  
113 adiponectin full-length sequences. Interestingly, there was an *I. scapularis* gene  
114 (GenBank number: XM\_029975213) with substantial homology to the human and murine  
115 adiponectin receptors, which we designated *I. scapularis* adiponectin receptor-like  
116 (*ISARL*). The corresponding *ISARL* protein sequence (GenBank number: XP\_029831073)  
117 was also identified. The full-length *ISARL* mRNA encoded a protein with 384 amino acid  
118 residues and 71% amino acid sequence similarity to both the human and mouse  
119 adiponectin receptor protein 1 and 2. It also has high similarity (87%) to homologs from  
120 insect species, including the *Drosophila melanogaster* adiponectin receptor (GenBank  
121 number: NP\_732759) (Fig. S1). Structure prediction and hydrophobicity analysis  
122 indicated that *ISARL* has seven transmembrane (TM) domains (Fig. S2). Comparison of  
123 the amino acid sequences between vertebrate and invertebrate species revealed that the

124 predicted transmembrane regions are highly conserved, especially in the TM3 domain  
125 (Fig. S1).

126

### 127 **Silencing *ISARL* reduces *B. burgdorferi* colonization by *I. scapularis* nymphs**

128

129 As *I. scapularis* lack an obvious adiponectin homolog, we examined whether  
130 expression of *ISARL* could be stimulated in the feeding vector by allowing ticks to engorge  
131 on mice, including uninfected and *B. burgdorferi*-infected animals. Interestingly a blood  
132 meal containing *B. burgdorferi* resulted in significantly increased expression of *ISARL* in  
133 the nymphal tick guts ( $P < 0.0001$ ) (Fig. 1A). This suggests that the presence of *B.*  
134 *burgdorferi* in the blood meal helps to stimulate tick metabolic activity and/or that *ISARL*  
135 may have an important role during *B. burgdorferi* colonization of the tick gut.

136

137 Since *ISARL* expression was upregulated upon *B. burgdorferi* infection, we  
138 hypothesized that RNAi-mediated silencing of *ISARL* would affect *B. burgdorferi*  
139 colonization by nymphal *I. scapularis*. To this end, *ISARL* or *GFP* (control) dsRNA was  
140 injected into the guts of pathogen-free nymphs by anal pore injection. Then, the ticks were  
141 allowed to feed on *B. burgdorferi*-infected mice. Quantitative RT-PCR (qPCR) analysis  
142 showed a significant decrease of *ISARL* expression in the guts of ds *ISARL*-injected ticks  
143 ( $P < 0.01$ ) when compared to that in control ds *GFP*-injected tick guts (Fig. 1B), indicating  
144 that the knockdown was successful. The engorgement weights of ds *ISARL*-injected  
145 nymphs and control ds *GFP*-injected nymphs were comparable ( $P > 0.05$ ) (Fig. 1C),  
146 suggesting that silencing *ISARL* had no effect on tick feeding behavior. However, *ISARL*-

147 silenced nymph guts showed a marked reduction of the *B. burgdorferi* burden ( $P < 0.001$ )  
148 when compared to that in control ticks (Fig. 1D), demonstrating that ISARL is associated  
149 with *B. burgdorferi* colonization in the nymphal tick gut.

150

### 151 **Silencing *ISARL* does not affect *B. burgdorferi* transmission by *I. scapularis*** 152 **nymphs**

153

154 To determine whether ISARL might also play a role in the transmission of *B.*  
155 *burgdorferi* to the mammalian host, we silenced *ISARL* in *B. burgdorferi*-infected nymphs  
156 by microinjection of ds *ISARL* into the ticks. The results showed that *B. burgdorferi*  
157 burdens in the skin of mice (ear skin distal from the tick bite site) at 7, 14, and 21 days  
158 post tick detachment, and in heart and joint tissues 21 days post tick detachment were  
159 comparable ( $P > 0.05$ ) in mice fed upon by ds *GFP*- or by ds *ISARL*-injected nymphs  
160 (Figs. 1E and 1F), suggesting that silencing *ISARL* had no observable effect on *B.*  
161 *burgdorferi* transmission by *I. scapularis* nymphs.

162

### 163 **Potential ISARL-dependent pathways associated with *B. burgdorferi* colonization**

164

165 To investigate the mechanisms underlying the association of ISARL with *B.*  
166 *burgdorferi* colonization by *I. scapularis*, we assessed the presence or absence of ISARL  
167 on tick physiology by comparing transcriptomes of ds *ISARL* and ds *GFP* (control)  
168 injected ticks after engorgement on *B. burgdorferi*-infected or uninfected mice, using  
169 RNA-seq.



170

171           After feeding on uninfected mice, 18 genes were significantly differentially  
172 expressed with six upregulated and 12 downregulated genes in the guts of ds *ISARL*-  
173 injected nymphal ticks when compared to that in control ds *GFP*-injected tick guts (Fig.  
174 2A; Table S1). 35 genes were differentially expressed at a significant level, and all these  
175 genes were downregulated in the guts of ds *ISARL*-injected *I. scapularis* when compared  
176 to that in control ds *GFP*-injected ticks after feeding on *B. burgdorferi*-infected mice (Fig.  
177 2B; Table S2). In addition, the transcriptome analysis further demonstrated that the *ISARL*  
178 gene was successfully silenced by RNAi (Tables S1 and S2) and this was also confirmed  
179 by qPCR (Fig. 2C). No common differentially expressed genes except *ISARL* were  
180 observed between control or experimental ticks feeding on uninfected or *B. burgdorferi*-  
181 infected mice (Fig. 2D), suggesting that the 34 significantly expressed genes were all  
182 induced by *B. burgdorferi*, or the influence of *B. burgdorferi* on the host blood components,  
183 rather than blood meal itself, in absence of *ISARL*.

184

185           In response to the blood meal, a significant change of the metabolic pathways in  
186 ticks was observed in absence of *ISARL*. In particular, based on GO functional  
187 classification and KEGG pathways analyses, the glutathione metabolic process with nine  
188 genes (e.g., gamma glutamyl transpeptidase, G2/mitotic-specific cyclin A, and glutathione  
189 S-transferase) was significantly altered. Moreover, the genes involved in metabolic  
190 pathways such propanoate metabolism and carbohydrate transport and metabolism (e.g.,  
191 acyl-CoA synthetase and soluble maltase-glucoamylase) were also significantly changed  
192 in absence of *ISARL* after engorging on uninfected mice.

193

194           Similarly, many metabolism-associated genes, including multiple amino acids,  
195 lipids or sugars synthesis and transport genes (e.g., 3-hydroxyacyl-CoA dehydrogenase,  
196 glycogen phosphorylase, and sugar transporter) were significantly downregulated in the  
197 absence of ISARL after engorging on *B. burgdorferi*-infected mice. GO functional  
198 classification and KEGG pathways also showed that the most downregulated genes were  
199 involved in fatty acid, lipid and phospholipid, purine, amino acid, glycerophospholipid, and  
200 carbohydrate metabolism and transport pathways after silencing *ISARL* (Fig. 2E),  
201 suggesting that ISARL functions as a metabolic moderator in ticks.

202

### 203 **ISARL-mediated phospholipid metabolic pathways affect *B. burgdorferi*** 204 **colonization**

205

206           To further investigate the exact metabolism pathway(s) involving in *B. burgdorferi*  
207 colonization, we first selected 18 well-annotated and metabolism-related differentially  
208 expressed genes to validate the accuracy and reproducibility of the transcriptome  
209 bioinformatic analyses by qPCR. The samples for qPCR validation are independent of  
210 the sequencing samples. In general, the qPCR results indicated that all the tested genes  
211 showed concordant direction of change with the RNA-seq bioinformatic data except one  
212 gene, pyridoxine kinase (*PDXK*) (Fig. S3), indicating the accuracy and reliability of our  
213 RNA-seq libraries. Of these 17 down-regulated genes, four genes showed significant  
214 downregulation profiles ( $P < 0.05$ ). These four genes included phosphatidylserine  
215 synthase I (*PTDSS1*) (Figs 2F and 2G), N-CAM Ig domain-containing protein (*NCAM*),

216 vacuolar H<sup>+</sup>-ATPase V1 sector, subunit G (*V-ATPase*), and sideroflexin 1,2,3, putative  
217 (*SFXN*) (Fig. S4A).

218

219 Then, we silenced these four genes individually and investigated their potential  
220 roles in *B. burgdorferi* colonization. We also silenced another four genes, whose *P*-values  
221 were very close to significant (Fig. S4B). These four genes included 3-hydroxyacyl-CoA  
222 dehydrogenase, putative (*3HADH*), adenylosuccinate synthetase (*ADSS*), GMP synthase,  
223 putative (*GMPS*), and alpha-actinin, putative (*ACTN*). We did not observe a significant  
224 decrease of *B. burgdorferi* burden in nymphal tick guts after silencing *NCAM*, *V-ATPase*,  
225 *SFXN*, *ADSS*, *GMPS*, and *ACTN* compared to ds *GFP*-injected ticks (Fig. S5). Instead,  
226 we found that *PTDSS1*-silenced nymphs showed a marked reduction in the *B. burgdorferi*  
227 burden in the guts when compared to that in control ticks ( $P < 0.05$ ) (Fig. 2H). Furthermore,  
228 a blood meal containing *B. burgdorferi* resulted in significantly increased expression of  
229 *PTDSS1* in the nymphal tick guts ( $P < 0.05$ ) (Fig. 2I), suggesting that *PTDSS1* indeed  
230 has a critical role during *B. burgdorferi* colonization of the tick gut. *PTDSS1* is involved in  
231 phospholipid metabolism, and mainly uses L-serine as the phosphatidyl acceptor to  
232 generate the anionic lipid phosphatidylserine (PS), which serves as a precursor for  
233 phosphatidylethanolamine (PE) and phosphatidylcholine (PC) synthesis (Fig. 2J) (Aktas  
234 et al., 2014). Importantly, PC is one of the main phospholipids on the cellular membrane  
235 of *B. burgdorferi* (Kerstholt et al., 2020). However, *B. burgdorferi* lacks the central  
236 phospholipid metabolic enzymes. To further validate that the phospholipid metabolic  
237 pathway in tick is critical for *B. burgdorferi*, we silenced another enzyme (ISARL-  
238 unrelated), phosphatidylserine decarboxylase (*PSD*, ISCI003338), which is an important

239 enzyme in the synthesis of PE in both prokaryotes and eukaryotes (Voelker, 1997).  
240 Interestingly, we also found a significantly decreased *B. burgdorferi* burden in ds *PSD*-  
241 injected tick guts ( $P < 0.05$ ), and PSD and PTDSS1 elicit a similar degree of reduced *B.*  
242 *burgdorferi* levels (Fig. 2K). Taken together, ISARL-mediated phospholipid metabolic  
243 pathways associated with PTDSS1 have a critical role in *B. burgdorferi* colonization.

244

245 **Mammalian adiponectin regulates tick glucose metabolism pathway but has no**  
246 **effect on *B. burgdorferi* colonization**

247

248 We further explored how the ISARL signaling pathway is activated in ticks.  
249 Although the *I. scapularis* genome encodes an adiponectin receptor homolog, an  
250 adiponectin ligand is not present, at least in currently annotated *Ixodes* genome  
251 databases. This suggests that ticks may utilize vertebrate adiponectin to activate the  
252 adiponectin receptor during a blood meal, that tick have another ligand that stimulates the  
253 receptor, or both. Since ticks are habitually exposed to adiponectin present during a  
254 bloodmeal, we examined whether the tick adiponectin receptor could interact with  
255 incoming mammalian adiponectin during blood feeding. We injected recombinant mouse  
256 adiponectin into unfed ticks and investigated whether mammalian adiponectin could  
257 activate downstream signaling of tick adiponectin receptor by RNA-seq (Fig. 3A). The  
258 data showed that one classic downstream gene of mammalian adiponectin signaling, tick  
259 glucose-6-phosphatase (*G6P*, ISCW017459), was significantly downregulated in the  
260 presence of mammalian adiponectin (Fig. 3A; Table S3). It has been demonstrated that  
261 in mammals, the binding of adiponectin to its receptor suppresses *G6P* and

262 phosphoenolpyruvate carboxykinase (*PEPCK*) expression through an AMP-activated  
263 protein kinase (AMPK)-dependent mechanism, which further inhibits glycogenolysis and  
264 gluconeogenesis (Fig. 3B) (Tishinsky, 2012). We further searched *G6P* and *PEPCK*  
265 homologs in *I. scapularis* genome, and two *G6P* homologs (ISCW017459 and  
266 ISCW018612) and three *PEPCK* homologs (ISCW001902, and ISCW000524,  
267 ISCW001905) were identified. We designated them as *G6P1*, *G6P2*, *PEPCK1*, *PEPCK2*,  
268 and *PEPCK3*, respectively. We evaluated gene expression of all these five genes after  
269 injection of recombinant adiponectin and GFP proteins. Interestingly, *G6P1*, *G6P2*,  
270 *PEPCK2*, and *PEPCK3* were significantly downregulated in the tick gut in the presence  
271 of adiponectin (Fig. 3C). To further validate the effects on tick glucose metabolism of  
272 interaction of mammalian adiponectin and tick ISARL, we fed ticks on C57BL/6J mice  
273 deficient in adiponectin (*Adipo*<sup>-/-</sup>) and wild-type (WT) animals, and allowed them to feed  
274 to repletion (Fig. 3D). We then evaluated the expression of five *G6P* and *PEPCK* genes,  
275 and found that *G6P1* and *G6P2* also showed significant downregulation in the presence  
276 of adiponectin ( $P < 0.05$ ), while *PEPCK* gene expression was not altered ( $P > 0.05$ ) (Fig.  
277 3E).

278

279 To investigate whether the interaction of adiponectin and the receptor in ticks  
280 influences *B. burgdorferi* colonization, pathogen-free nymphs were placed on *B.*  
281 *burgdorferi*-infected WT and *Adipo*<sup>-/-</sup> mice and allowed to feed to repletion (Fig. 3F). No  
282 significant difference of the *B. burgdorferi* burden in ticks feeding on WT and *Adipo*<sup>-/-</sup> mice  
283 was noted ( $P > 0.05$ ) (Fig. 3G). We also silenced the *G6P1* and *G6P2* genes to determine  
284 whether G6P-mediated glucose metabolic changes affect *B. burgdorferi* colonization.

285 Consistent with the previous observation, there was no significant difference in the *B.*  
286 *burgdorferi* burden between control and *G6P1*-silenced ticks ( $P > 0.05$ ) (Fig. S6A). *G6P2*-  
287 silenced ticks also did not show altered *B. burgdorferi* levels ( $P > 0.05$ ) (Fig. S6B).  
288 Furthermore, the expression of *G6P1* and *G6P2* in the nymphs was not influenced by *B.*  
289 *burgdorferi* infection ( $P > 0.05$ ) (Fig. S6C), suggesting that *G6P1*- or *G6P2*-mediated  
290 changes do not affect *B. burgdorferi* colonization of the tick gut. To assess any changes  
291 in the adiponectin concentration in murine serum after *B. burgdorferi* infection, the mice  
292 were injected subcutaneously with 100  $\mu$ L containing  $1 \times 10^4$  or  $1 \times 10^7$  *B. burgdorferi*, or  
293 PBS as a control. We found that *B. burgdorferi* does not influence the adiponectin  
294 concentration in murine blood (Fig. 3H). Taken together, these data suggest that  
295 mammalian adiponectin can regulate ISARL-mediated glucose metabolism pathway,  
296 however, it has no effect on *B. burgdorferi* colonization.

297

### 298 ***B. burgdorferi* interacts with ISARL through tick C1QL3 protein**

299

300 We therefore examined whether *I. scapularis* protein(s) might interact with ISARL  
301 and if *B. burgdorferi* could influence this process -- for *ISARL* silencing diminished *B.*  
302 *burgdorferi* colonization. To this end, we performed a blastp search of the *I. scapularis*  
303 genome with the globular C1Q domain of human and mouse adiponectin, which is known  
304 to stimulate the adiponectin receptor (Yamauchi et al., 2002). Two tick proteins had blastp  
305 hits with the human adiponectin C1Q domain (Fig. 4A) and were annotated as  
306 complement C1q-like protein 3 (C1QL3) (GenBank number: XP\_002415101) and  
307 conserved hypothetical protein (GenBank number: EEC18766), respectively. These are

308 identical proteins except that C1QL3 has a signal peptide sequence and we therefore  
309 focused on C1QL3.

310

311 We first examined whether expression of *C1QL3* could be stimulated by *B.*  
312 *burgdorferi* infection. A blood meal containing *B. burgdorferi* resulted in significantly  
313 increased expression of *C1QL3* in the nymphal tick guts ( $P < 0.01$ ) (Fig. 4B). We then  
314 generated *C1QL3*-silenced nymphs and found that these ticks had a marked reduction of  
315 the *B. burgdorferi* burden in the guts when compared to that in control *I. scapularis* ( $P <$   
316  $0.05$ ) (Fig. 4C). This is the same observation as with silencing of *ISARL*, suggesting that  
317 *B. burgdorferi* activates the *ISARL*-signaling pathway through the tick *C1QL3* protein.  
318 Because *C1QL3* C1Q domain has high similarity (64.0%) with the human adiponectin  
319 C1Q domain (Fig. S7), and C1Q proteins have been demonstrated to activate diverse  
320 pathways through the adiponectin receptor (Zheng et al., 2011), we investigated whether  
321 tick *C1QL3* could interact with *ISARL*. Human embryonic kidney HEK293T cells were  
322 transfected with the *ISARL* expression vector (pEZT-*ISARL*). The results showed that tick  
323 *ISARL* can be successfully expressed, as validated by cell staining and western blot (Figs  
324 4D and 4E), on the HEK293T cell membrane (Fig. 4D). We then generated tick *C1QL3*  
325 protein in a *Drosophila* expression system (Fig. 4F). The HEK293T cells were then  
326 incubated with the recombinant *C1QL3* protein. After washing and staining, recombinant  
327 *C1QL3* could be detected on the surface of *ISARL*-expressed rather than empty plasmid  
328 transfected HEK293T cells (Fig. 4G). A pull-down assay also indicated that recombinant  
329 *C1QL3* interacts with *ISARL* as demonstrated by the detection of *C1QL3* only in *ISARL*  
330 expressed cells pellet (Fig. 4H). In addition, co-immunolocalization demonstrated that the

331 C1QL3 protein specifically binds to the ISARL-expressed cell membrane (Fig. 4I). These  
332 results suggest that tick C1QL3 interacts with ISARL.

333

334         Since C1QL3 is a ligand of tick ISARL and also involved in *Borrelia* colonization,  
335 we further investigated whether C1QL3 has a role on the activation of ISARL by *Borrelia*.  
336 We first assessed if silencing of *C1QL3* influenced *ISARL* expression after feeding on *B.*  
337 *burgdorferi*-infected mice (Fig. 5A). QPCR assessment showed that the *ISARL* transcript  
338 level following RNAi silencing of *C1QL3* was significantly lower than that in control ds  
339 *GFP*-injected tick guts after feeding on *B. burgdorferi*-infected mice ( $P < 0.05$ ) (Fig. 5B).  
340 More importantly, after silencing *C1QL3*, a blood meal containing *B. burgdorferi* did not  
341 significantly increase expression of *ISARL* in the nymphal tick guts as compared to  
342 feeding on clean mice ( $P > 0.05$ ) (Fig. 5C), further suggesting that C1QL3 plays a role in  
343 the ISARL signaling pathways.

344



## 345 Discussion

346

347 Adiponectin is a hormone, secreted mainly from adipocytes, that stimulates  
348 glucose utilization and fatty acid oxidation (Berg et al., 2001; Fruebis et al., 2001). The  
349 key roles of adiponectin in regulating energy homeostasis are mediated by adiponectin  
350 receptors across species including humans, yeast, nematodes, and flies (Kwak et al.,  
351 2013; Narasimhan et al., 2005; Svensson et al., 2011; Yamauchi et al., 2003). In this  
352 study, we have identified and characterized an adiponectin receptor homologue from *I.*  
353 *scapularis*, ISARL. ISARL shares significant sequence similarities with human, mouse,  
354 and *Drosophila* adiponectin receptors. In addition, ISARL contains the canonical features  
355 of adiponectin receptors, including conserved TM domains, a long internal N-terminal  
356 region, and a relatively short external C-terminal region. The highly conserved amino  
357 acids and the structures of ISARL and the receptor from *D. melanogaster* suggest that  
358 their ligands and signaling pathways may also be conserved in arthropods. However,  
359 homologs of adiponectin have not yet been identified in arthropods, suggesting that  
360 ligands for adiponectin receptors in arthropods may interact in different ways than in  
361 vertebrates.

362

363 The Lyme disease agent, *B. burgdorferi*, engages in intimate interactions with *I.*  
364 *scapularis* during its acquisition and colonization of the tick gut (Radolf et al., 2012). This  
365 is accompanied by dramatic changes in the expression profiles of *Borrelia* and tick gut  
366 genes, which are critical drivers for colonization, persistence or transmission (Kurokawa  
367 et al., 2020; Narasimhan et al., 2017). In our study, expression of *ISARL* was significantly

368 increased in the nymphal tick gut after *B. burgdorferi* infection. The upregulation of *ISARL*  
369 correlates with *Borrelia* infection in the gut. More interestingly, after silencing *ISARL*  
370 expression in the tick gut by anal pore injection, nymphal tick guts showed a marked  
371 reduction in the *B. burgdorferi* burden when compared to that in control ticks,  
372 demonstrating that *ISARL* facilitates *B. burgdorferi* colonization.

373

374 We utilized RNA-seq to elucidate the pathways that are altered when *ISARL* is  
375 silenced in ticks that engorge on clean and *B. burgdorferi*-infected mice. All the  
376 differentially expressed genes were downregulated, and GO functional classification and  
377 KEGG pathways also showed that the most downregulated genes are involved in fatty  
378 acid, lipid and phospholipid, purine, amino acid, glycerophospholipid, and carbohydrate  
379 metabolism and transport pathways. Therefore, *ISARL* in ticks functions as a metabolic  
380 regulator.

381

382 Importantly, *ISARL* can regulate a critical enzyme involved in phospholipid  
383 metabolism, *PTDSS1*. Regulation of *PTDSS1* by adiponectin receptors is also found in  
384 other organisms such as yeast, where the adiponectin receptor homolog *Izh2* is  
385 connected to phospholipid metabolism through co-regulation of the expression of inositol-  
386 3-phosphate synthase (*INO1*) and phosphatidylserine synthase (*CHO1*, homolog of  
387 *PTDSS1*) genes with zinc-responsive activator protein (*Zap1*) (Ušaj et al., 2015).  
388 Silencing of *I. scapularis* *PTDSS1* led to a reduced spirochete burden in the guts, thereby  
389 linking *B. burgdorferi* colonization with phospholipid metabolism. The *B. burgdorferi*  
390 genome is small and encodes a limited number of metabolic enzymes (Casjens et al.,

391 2000; Fraser et al., 1997). The restricted biosynthetic capability forces *B. burgdorferi* to  
392 rely on its vertebrate and arthropod hosts for nutrients or enzymes that it cannot  
393 synthesize (Tilly et al., 2008). Interestingly, we also found that silencing of *I. scapularis*  
394 *3HADH*, which is involved in fatty acid metabolic processes, decreased the *B. burgdorferi*  
395 burden in tick gut (Figure S5D). The markedly decreased *B. burgdorferi* burden in ticks  
396 after silencing of *PTDSS1*, *PSD* and *3HADH*, suggests that the spirochete may require  
397 the tick for selected metabolic needs.

398

399 We also found that *B. burgdorferi* can interact with an adiponectin-related protein,  
400 C1QL3, in ticks, which associates with ISARL. The interactions lead to phospholipid  
401 metabolism changes in ticks. We propose that C1QL3 in tick is mainly involved in  
402 metabolism, rather than complement activation, as demonstrated by the decreased *B.*  
403 *burgdorferi* level after silencing C1QL3. Indeed, some of C1Q/TNF family proteins are  
404 associated with metabolism. In addition to adiponectin, proteins such as C1Q/TNF-related  
405 protein 3 (CTRP3), CTRP5, CTRP9, CTRP13 (C1QL3), and CTRP15 also belong to  
406 adipokine family, and have been reported to be associated with the regulation of glucose,  
407 lipid or other metabolisms (Jiang et al., 2018; Li et al., 2011; Mi et al., 2019; Wei et al.,  
408 2011; Wolf et al., 2016). Importantly, C1Q proteins have been demonstrated to activate  
409 diverse pathways through adiponectin receptor (Zheng et al., 2011).

410

411 In summary, we demonstrate that ISARL plays a key role in metabolic pathways  
412 in *I. scapularis*. ISARL-mediated phospholipid metabolism by *PTDSS1* contributes to *B.*  
413 *burgdorferi* colonization and an adiponectin-related protein, C1QL3, is involved in ISARL

414 signaling pathway. These studies elucidate a new pathway involved in tick metabolism,  
415 and demonstrate that *B. burgdorferi* co-opts the activation of this pathway to facilitate  
416 colonization of *I. scapularis*. These processes are crucial to understanding the complex  
417 life cycle of the Lyme disease agent within ticks, and may be applicable to other  
418 arthropods and arthropod-borne infectious agents.  
419

## 420 **Materials and Methods**

421

### 422 **Ethics statement**

423

424 Animal care and housing were performed according to the Guide for the Care and  
425 Use of laboratory Animals of National Institutes of Health, USA. All protocols in this study  
426 were approved by the Yale University Institutional Animal Care and Use Committee  
427 (YUIACUC) (approval number 2018-07941). All animal experiments were performed in a  
428 Biosafety Level 2 animal facility.

429

### 430 **Mice, spirochetes, ticks, and cells**

431

432 C3H/HeJ mice, C57BL/6J mice wild-type (WT), and C57BL/6J mice deficient in  
433 adiponectin (*Adipo<sup>-/-</sup>*) were purchased from the Jackson Laboratory  
434 (<https://www.jax.org/strain/008195>). All mice were bred and maintained in a pathogen-  
435 free facility at Yale University. The spirochetes *B. burgdorferi* N40 were grown at 33 °C in  
436 Barbour-Stoenner-Kelly H (BSK-H) complete medium (Sigma-Aldrich, #B8291) with 6%  
437 rabbit serum. The live cell density was  $\sim 10^6$ - $10^7$  cells/mL as determined by dark field  
438 microscopy and hemocytometric analysis. To obtain *B. burgdorferi*-infected mice, the  
439 mice were injected subcutaneously with 100  $\mu$ L of *B. burgdorferi* N40 ( $1 \times 10^5$  cells/mL).  
440 Two weeks after inoculation, the *B. burgdorferi* burden in mice was assayed by qPCR  
441 analysis of spirochete DNA in murine ear punch biopsies as described below. DNA was  
442 extracted from mouse skin-punch biopsies using the DNeasy tissue kit (QIAGEN, #69506)

443 according to the manufacturer's protocol. The DNA was analyzed by qPCR using  
444 *flagellinB* (*flaB*) primers, and data was normalized to mouse *actin*. The primer sequences  
445 are shown in Table S4. Pathogen-free *I. scapularis* larvae were acquired from the Centers  
446 for Disease Control and Prevention. The larval ticks were fed to repletion on pathogen-  
447 free C3H/HeJ mice and allowed to molt to nymphs. *B. burgdorferi*-infected nymphs were  
448 generated by placing larvae on *B. burgdorferi*-infected C3H/HeJ mice, and fed larvae  
449 were molted to nymphs. Nymphal ticks were maintained at 85% relative humidity with a  
450 14h light and 10h dark period at 23 °C. Human embryonic kidney HEK293T cells (ATCC,  
451 #CRL-3216) was used for vitro studies. The HEK293T cells were grown in Dulbecco's  
452 Modified Eagle's Medium (DMEM, ThermoFisher, #11965-118) media supplemented with  
453 10% Fetal Bovine Serum (FBS, Sigma, #12306C-500).

454

#### 455 **Identification and characterization of the *I. scapularis* adiponectin receptor-like** 456 **(*ISARL*) gene**

457

458 The human adiponectin receptor protein 1 (GenBank number: NP\_001277482)  
459 and 2 (GenBank number: NP\_001362293) sequences were used to conduct tblastn and  
460 blastp searches against the available black-legged tick database (taxid:6945) using NCBI  
461 default parameters. Tick adiponectin receptor sequence was further validated by  
462 amplification with primers in Table S4. Multiple alignment of protein sequences were  
463 performed using the Clustal Omega (<https://www.ebi.ac.uk/Tools/msa/clustalo/>) (Madeira  
464 et al., 2019) or Uniprot (<https://www.uniprot.org/align/>). The similarities of adiponectin  
465 receptor protein sequences were measured in EMBOSS supermatcher

466 (<https://www.bioinformatics.nl/cgi-bin/emboss/supermatcher>). The protein structure of  
467 ISARL was predicted in SWISS-MODEL (<https://swissmodel.expasy.org/>) (Guex and  
468 Peitsch, 1997; Waterhouse et al., 2018). Hydrophobicity analysis was performed using  
469 ProtScale (<https://web.expasy.org/protscale/>) (Gasteiger et al., 2005).

470

#### 471 **Tick exposure to *B. burgdorferi* and expression of *ISARL***

472

473 To evaluate gene expression of *ISARL* upon *B. burgdorferi* infection, pathogen-  
474 free *I. scapularis* nymphs were placed on *B. burgdorferi*-free and -infected mice  
475 (C3H/HeJ). At least three mice were used in each experiment, and the ticks were allowed  
476 to feed to repletion. Both *B. burgdorferi*-free and -exposed tick guts were dissected under  
477 the dissecting microscope. The RNA from dissected guts was purified by Trizol (Invitrogen,  
478 #15596-018) following the manufacturer's protocol, and cDNA was synthesized using the  
479 iScript cDNA Synthesis Kits (Bio-Rad, #1708891). qPCR was performed using iQ SYBR  
480 Green Supermix (Bio-Rad, #1725124) on a Bio-Rad cycler with a program consisting of  
481 an initial denaturing step of 2 min at 95°C and 45 amplification cycles consisting of 20 s  
482 at 95°C followed by 15 s at 60°C, and 30 s at 72°C. The genes and corresponding primer  
483 sequences are shown in Table S4. The specific target transcripts of *ISARL* and the  
484 reference gene tick *actin* were quantified by extrapolation from a standard curve derived  
485 from a series of known DNA dilutions of each target gene, and data was normalized to  
486 tick *actin*.

487

#### 488 **RNAi silencing of targeted genes**

489

490 Fed-nymph gut cDNA was prepared as described above and used as template to  
491 amplify segments of targeted genes. The PCR primers with T7 promoter sequences are  
492 shown in Table S4. Double-stranded RNA (dsRNA) were synthesized using the  
493 MEGAscript RNAi kit (Invitrogen, #AM1626M) using PCR-generated DNA template that  
494 contained the T7 promoter sequence at both ends. The dsRNA quality was examined by  
495 agarose gel electrophoresis. DsRNA of the *Aequorea victoria* green fluorescent protein  
496 (GFP) was used as a control. Pathogen-free and -infected tick nymphs were injected in  
497 the anal pore with dsRNA (6 nL) using glass capillary needles as described by  
498 Narasimhan and colleagues (2004).

499

#### 500 **Effects of silenced genes on *B. burgdorferi* colonization and transmission**

501

502 To examine the effects of silencing targeted genes on the colonization of *B.*  
503 *burgdorferi* in the tick gut, dsRNA microinjected pathogen-free *I. scapularis* nymphs were  
504 placed on *B. burgdorferi*-infected mice (C3H/HeJ) and allowed to feed to repletion. The  
505 ticks were then collected for gut dissection. The *B. burgdorferi* burden in the tick gut was  
506 quantified by amplifying *flaB*. *FlaB* was quantified by extrapolation from a standard curve  
507 derived from a series of known DNA dilutions of *flaB* gene, and data was normalized to  
508 tick *actin*. The knockdown efficiency of targeted genes was tested as described above.  
509 Specifically, the expression of targeted genes was estimated with the  $\Delta\Delta C_T$  method  
510 (Schmittgen and Livak, 2008) using the reference gene *actin*. To test the effects of  
511 silencing *ISARL* on the transmission of *B. burgdorferi*, a group of three to five *GFP* or



512 *ISARL* dsRNA injected *B. burgdorferi*-infected nymphs were placed on each C3H/HeJ  
513 mouse (at least five mice each in the *GFP* or *ISARL* dsRNA groups) and allowed to feed  
514 to repletion. Ticks are placed on the mouse head/back between the ears. At 7 and 14  
515 days-post tick detachment, the mice were anesthetized, and skin was aseptically punch  
516 biopsied and assessed for spirochete burden by qPCR. Ticks feed in head area and skin  
517 punch biopsies are collected from the pinnae /ears. This site is considered distal as it is  
518 not at the site of tick bite. Twenty-one days post tick detachment, the mice were sacrificed,  
519 and ear skin, heart, and joints were aseptically collected and assessed for spirochete  
520 burden by qPCR.

521

## 522 **RNA-seq and bioinformatic analyses**

523

524 DsRNA (ds *ISARL* and ds *GFP*) microinjected pathogen-free *I. scapularis* nymphs  
525 were placed on clean and *B. burgdorferi*-infected mice (C3H/HeJ), respectively, and  
526 allowed to feed to repletion. Then, the ticks were collected for gut dissection. Total RNA  
527 was purified as described above. In addition, to check the transcriptional alterations in the  
528 tick gut in the presence of mammalian adiponectin, pathogen-free tick nymphs were  
529 injected in the anal pore with recombinant mouse adiponectin (MilliporeSigma, #SRP3297)  
530 and GFP proteins (SinoBiological, #13105-S07E). Then, the guts were dissected after 8h  
531 injection, and RNA was purified. The RNA samples were then submitted for library  
532 preparation using TruSeq (Illumina, San Diego, CA, USA) and sequenced using Illumina  
533 HiSeq 2500 by paired-end sequencing at the Yale Centre for Genome Analysis (YCGA).  
534 The *I. scapularis* transcript data was downloaded from the VectorBase

535 (<https://vectorbase.org/vectorbase/app/>) (Giraldo-Calderon et al., 2015) and indexed  
536 using the kallisto-index (Bray et al., 2016). The reads from the sequencer were pseudo-  
537 aligned with the index reference transcriptome using kallisto (Bray et al., 2016). The  
538 counts generated were processed by DESeq2 (Love et al., 2014) in RStudio  
539 (<https://rstudio.com>). Gene ontology (GO) enrichment analysis and Kyoto Encyclopedia  
540 of Genes and Genomes (KEGG) pathway enrichment analyses were conducted using the  
541 functional annotation tool DAVID 6.8 (Sherman and Lempicki, 2009).

542

543         Recombinant mouse adiponectin (Sigma, #SRP3297) and GFP protein (Sino  
544 Biological, #13105-S07E) were injected into pathogen-free *I. scapularis* nymphs. After 8h,  
545 the ticks were collected for gut dissection. Total RNA was purified and RNA-seq and  
546 analyses were performed as described above.

547

#### 548 **Expression of ISARL and binding assays**

549

550         Tick *ISARL* gene was PCR amplified from nymph cDNA using the primer pair listed  
551 in Table S4, then cloned into the *Xba*I and *Not*I sites of the pEZT-Dlux, a modified pEZT-  
552 BM vector (Addgene, #74099) in-frame with a HA-tag sequence, by Gibson Assembly  
553 Cloning Kit (NEB, #E5510S). HEK293T cells were transfected with the *ISARL* expression  
554 plasmid (pEZT-ISARL) using TransIT 2020 (Mirus, #MIR5404). After 40 h post  
555 transfection, the cells were washed with 1X PBS and then incubated with rC1QL3 protein  
556 with His/V5 tag, respectively. After 16 h incubation with gentle agitation, the cells were  
557 washed with PBS and fixed in 4% PFA for 15 min at room temperature. Then, the cells

558 were blocked in 1% BSA in PBS for 1 h, and subsequently immunolabeled with anti-HA  
559 antibody (1:100, Cell Signaling Technology, #C29F4) for checking ISARL expression, and  
560 V5 tag monoclonal antibody (1:100, Invitrogen, # R960-25) for checking C1QL3 binding.  
561 Cells were washed with PBS three times and then immunolabeled with secondary  
562 antibodies of Goat anti-Rabbit IgG (H+L) Highly Cross-Adsorbed Secondary Antibody,  
563 Alexa Fluor 488 (1:100, Invitrogen, #A-11034) and Goat anti-Mouse IgG (H+L) Cross-  
564 Adsorbed Secondary Antibody, Alexa Fluor 555 (1:100, Invitrogen, #A-21422) for 1 h at  
565 room temperature. Nuclei were stained with DAPI (Invitrogen, #D9542). After staining,  
566 the fluorescence signals were examined with an EVOS FL Auto Cell Imaging System  
567 (Thermo Fisher Scientific). We also conducted plot profile to help analyze co-localization  
568 by Image J software.

569

570 For checking ISARL expression by western blot, after 40 h post transfection, the  
571 cells were washed with 1X PBS and then lysed with 4X Laemmli Sample Buffer (Bio-Rad,  
572 #1610747). After centrifuge at high speed, the supernatant was loaded to perform  
573 western blot as described below. HRP Anti-His tag antibody (1:10,000, abcam, #ab3553)  
574 or anti-HA antibody (1:1000, Cell Signaling Technology, #C29F4) was used to detect  
575 expression of ISARL.

576

577 We conducted a pull-down assay to check the binding of ISARL and C1QL3 as  
578 described in Schuijt et al. (2011a). Briefly, HEK293T cells were transfected as described  
579 above. After 40 h post transfection, the cells were washed and suspended with 1X PBS  
580 and then incubated with rC1QL3 protein for 16 h with gentle agitation, respectively. Then

581 the cells were pelleted, and the pellet and supernatant were separated. The pellet was  
582 washed five to eight times in 1.5 ml PBS/0.1% BSA and was resuspended in the same  
583 volume as the supernatant. Equal volumes of supernatant and pellet were used to run  
584 western blot as described below. HRP V5-tag monoclonal antibody (1:1000, Invitrogen,  
585 # R961-25) was used to detect protein.

586

### 587 **Adiponectin concentration in serum after *B. burgdorferi* infection**

588

589 To assess the adiponectin concentration change in mice serum after *B. burgdorferi*  
590 infection, the C3H/HeJ mice were injected subcutaneously with 100  $\mu$ L  $1 \times 10^4$  and  $1 \times 10^7$   
591 cells/mL *B. burgdorferi* and PBS as a control (five mice in each group). At 0, 21 and 28  
592 days-post inoculation, the blood was collected from mice. The sera were separated from  
593 mice blood samples by centrifugation at 1000 x g for 10 min at 4 °C. The adiponectin in  
594 mice serum was quantified by Mouse Adiponectin/Acrp30 Quantikine ELISA Kit (R&D  
595 Systems, #MRP300).

596

### 597 **Effects of adiponectin in mice blood on *B. burgdorferi* colonization**

598

599 Pathogen-free *I. scapularis* nymphs were placed on *B. burgdorferi*-infected WT  
600 and Adipo<sup>-/-</sup> mice (C57BL/6J) and allowed to feed to repletion. The ticks were then  
601 collected for gut dissection. The *B. burgdorferi* burden in the tick gut was quantified as  
602 described above.

603

## 604 **Purification of recombinant proteins**

605

606 The *C1QL3* was PCR amplified from tick nymph cDNA using the primer pair listed  
607 in Table S4, then cloned into the *Bgl*III and *Xho*I sites of the pMT/BiP/V5-His vector  
608 (Invitrogen, #V413020). The recombinant protein was expressed and purified using the  
609 *Drosophila* Expression System as described previously (Schuijt et al., 2011b). The protein  
610 was purified from the supernatant by TALON metal affinity resin (Clontech, #635606) and  
611 eluted with 150 mM imidazole. The eluted samples were filtered through a 0.22- $\mu$ m filter  
612 and concentrated with a 10-kDa concentrator (MilliporeSigma, #Z740203) by  
613 centrifugation at 4 °C. Recombinant protein purities were assessed by SDS-PAGE using  
614 4-20% Mini-Protean TGX gels (Bio-Rad, #4561094) and quantified using the BCA Protein  
615 Estimation kit (ThermoFisher Scientific, #23225).

616

## 617 **Western blot**

618

619 Proteins were separated by SDS-PAGE at 160 V for 1h. Proteins were transferred  
620 onto a 0.45- $\mu$ m-pore-size polyvinylidene difluoride (PVDF) membrane (Bio-Rad, #1620177)  
621 and processed for immunoblotting. The blots were blocked in 1% non-fat milk in PBS for  
622 60 min. Primary antibodies of PTDSS1 Rabbit pAb (1:1000, Abclonal, #A13065), Anti-  
623 beta Actin antibody (1:1000, abcam, #ab8224), HRP Anti-6X His tag antibody (1:10,000,  
624 abcam, #ab3553) or HRP V5 tag monoclonal antibody (1:1000, Invitrogen, # R961-25)  
625 were diluted in 0.05% PBST and incubated with the blots for 1 h at room temperature or  
626 4 °C overnight. HRP-conjugated secondary antibody (1:2500, Invitrogen, #62-6520 and

627 #31466) were diluted in PBST and incubated for 1 h at room temperature. After washing  
628 with PBST, the immunoblots were imaged and quantified with a LI-COR Odyssey imaging  
629 system.

630

### 631 **Statistical analysis**

632

633         Statistical significance of differences observed in experimental and control groups  
634 was analyzed using GraphPad Prism version 8.0 (GraphPad Software, Inc., San Diego,  
635 CA). Non-parametric Mann-Whitney test or unpaired t test were utilized to compare the  
636 mean values of control and tested groups, and  $P < 0.05$  was considered significant. The  
637 exact  $P$  values are shown in the source data.

## 638 References

639

- 640 Aktas, M., L. Danne, P. Möller, and F. Narberhaus. 2014. Membrane lipids in  
641 *Agrobacterium tumefaciens*: biosynthetic pathways and importance for  
642 pathogenesis. *Frontiers in plant science* 5:109.
- 643 Asch, E., D. Bujak, M. Weiss, M. Peterson, and A. Weinstein. 1994. Lyme disease: an  
644 infectious and postinfectious syndrome. *The Journal of rheumatology* 21:454-  
645 461.
- 646 Berg, A.H., T.P. Combs, X. Du, M. Brownlee, and P.E. Scherer. 2001. The adipocyte-  
647 secreted protein Acrp30 enhances hepatic insulin action. *Nature medicine* 7:947-  
648 953.
- 649 Bray, N.L., H. Pimentel, P. Melsted, and L. Pachter. 2016. Near-optimal probabilistic  
650 RNA-seq quantification. *Nat Biotechnol* 34:525-527.
- 651 Buechler, C., J. Wanninger, and M. Neumeier. 2010. Adiponectin receptor binding  
652 proteins—recent advances in elucidating adiponectin signalling pathways. *FEBS*  
653 *letters* 584:4280-4286.
- 654 Casjens, S., N. Palmer, R. Van Vugt, W. Mun Huang, B. Stevenson, P. Rosa, R.  
655 Lathigra, G. Sutton, J. Peterson, and R.J. Dodson. 2000. A bacterial genome in  
656 flux: the twelve linear and nine circular extrachromosomal DNAs in an infectious  
657 isolate of the Lyme disease spirochete *Borrelia burgdorferi*. *Molecular*  
658 *microbiology* 35:490-516.
- 659 Estrada-Peña, A., and F. Jongejan. 1999. Ticks feeding on humans: a review of records  
660 on human-biting Ixodoidea with special reference to pathogen transmission.  
661 *Experimental & applied acarology* 23:685-715.
- 662 Fraser, C.M., S. Casjens, W.M. Huang, G.G. Sutton, R. Clayton, R. Lathigra, O. White,  
663 K.A. Ketchum, R. Dodson, and E.K. Hickey. 1997. Genomic sequence of a Lyme  
664 disease spirochaete, *Borrelia burgdorferi*. *Nature* 390:580-586.
- 665 Fruebis, J., T.-S. Tsao, S. Javorschi, D. Ebbets-Reed, M.R.S. Erickson, F.T. Yen, B.E.  
666 Bihain, and H.F. Lodish. 2001. Proteolytic cleavage product of 30-kDa adipocyte  
667 complement-related protein increases fatty acid oxidation in muscle and causes  
668 weight loss in mice. *Proceedings of the National Academy of Sciences* 98:2005-  
669 2010.
- 670 Gasteiger, E., C. Hoogland, A. Gattiker, M.R. Wilkins, R.D. Appel, and A. Bairoch. 2005.  
671 Protein identification and analysis tools on the ExPASy server. In *The proteomics*  
672 *protocols handbook*. Springer, 571-607.
- 673 Giraldo-Calderon, G.I., S.J. Emrich, R.M. MacCallum, G. Maslen, E. Dialynas, P.  
674 Topalis, N. Ho, S. Gesing, C. VectorBase, G. Madey, F.H. Collins, and D.  
675 Lawson. 2015. VectorBase: an updated bioinformatics resource for invertebrate  
676 vectors and other organisms related with human diseases. *Nucleic Acids Res*  
677 43:D707-713.
- 678 Guex, N., and M.C. Peitsch. 1997. SWISS-MODEL and the Swiss-Pdb Viewer: an  
679 environment for comparative protein modeling. *electrophoresis* 18:2714-2723.
- 680 Jiang, F., M. Yang, X. Zhao, R. Liu, G. Yang, D. Liu, H. Liu, H. Zheng, Z. Zhu, and L. Li.  
681 2018. C1q/TNF-Related Protein5 (CTRP5) as a biomarker to predict metabolic



- 682 syndrome and each of its components. *International journal of endocrinology*  
683 2018:
- 684 Kadowaki, T., T. Yamauchi, N. Kubota, K. Hara, K. Ueki, and K. Tobe. 2006.  
685 Adiponectin and adiponectin receptors in insulin resistance, diabetes, and the  
686 metabolic syndrome. *The Journal of clinical investigation* 116:1784-1792.
- 687 Karpichev, I.V., L. Cornivelli, and G.M. Small. 2002. Multiple regulatory roles of a novel  
688 *Saccharomyces cerevisiae* protein, encoded by YOL002c, in lipid and phosphate  
689 metabolism. *Journal of Biological Chemistry* 277:19609-19617.
- 690 Kerstholt, M., M.G. Netea, and L.A. Joosten. 2020. *Borrelia burgdorferi* hijacks cellular  
691 metabolism of immune cells: Consequences for host defense. *Ticks and Tick-*  
692 *borne Diseases* 11:101386.
- 693 Kurokawa, C., G.E. Lynn, J.H. Pedra, U. Pal, S. Narasimhan, and E. Fikrig. 2020.  
694 Interactions between *Borrelia burgdorferi* and ticks. *Nature Reviews Microbiology*  
695 1-14.
- 696 Kwak, S.-J., S.-H. Hong, R. Bajracharya, S.-Y. Yang, K.-S. Lee, and K. Yu. 2013.  
697 *Drosophila* adiponectin receptor in insulin producing cells regulates glucose and  
698 lipid metabolism by controlling insulin secretion. *PLoS One* 8:e68641.
- 699 Li, Y., G.L. Wright, and J.M. Peterson. 2011. C1q/TNF-related protein 3 (CTRP3)  
700 function and regulation. *Comprehensive Physiology* 7:863-878.
- 701 Love, M.I., W. Huber, and S. Anders. 2014. Moderated estimation of fold change and  
702 dispersion for RNA-seq data with DESeq2. *Genome Biol* 15:550.
- 703 Madeira, F., Y.M. Park, J. Lee, N. Buso, T. Gur, N. Madhusoodanan, P. Basutkar, A.R.  
704 Tivey, S.C. Potter, and R.D. Finn. 2019. The EMBL-EBI search and sequence  
705 analysis tools APIs in 2019. *Nucleic acids research* 47:W636-W641.
- 706 Mi, Q., Y. Li, M. Wang, G. Yang, X. Zhao, H. Liu, H. Zheng, and L. Li. 2019. Circulating  
707 C1q/TNF-related protein isoform 15 is a marker for the presence of metabolic  
708 syndrome. *Diabetes/metabolism research and reviews* 35:e3085.
- 709 Narasimhan, M.L., M.a.A. Coca, J. Jin, T. Yamauchi, Y. Ito, T. Kadowaki, K.K. Kim, J.M.  
710 Pardo, B. Damsz, and P.M. Hasegawa. 2005. Osmotin is a homolog of  
711 mammalian adiponectin and controls apoptosis in yeast through a homolog of  
712 mammalian adiponectin receptor. *Molecular cell* 17:171-180.
- 713 Narasimhan, S., R.R. Montgomery, K. DePonte, C. Tschudi, N. Marcantonio, J.F.  
714 Anderson, J.R. Sauer, M. Cappello, F.S. Kantor, and E. Fikrig. 2004. Disruption  
715 of *Ixodes scapularis* anticoagulation by using RNA interference. *Proceedings of*  
716 *the National Academy of Sciences* 101:1141-1146.
- 717 Narasimhan, S., T.J. Schuijt, N.M. Abraham, N. Rajeevan, J. Coumou, M. Graham, A.  
718 Robson, M.-J. Wu, S. Daffre, and J.W. Hovius. 2017. Modulation of the tick gut  
719 milieu by a secreted tick protein favors *Borrelia burgdorferi* colonization. *Nature*  
720 *communications* 8:1-17.
- 721 Ouchi, N., and K. Walsh. 2007. Adiponectin as an anti-inflammatory factor. *Clinica*  
722 *chimica acta* 380:24-30.
- 723 Radolf, J.D., M.J. Caimano, B. Stevenson, and L.T. Hu. 2012. Of ticks, mice and men:  
724 understanding the dual-host lifestyle of Lyme disease spirochaetes. *Nature*  
725 *reviews microbiology* 10:87-99.
- 726 Rosenberg, R., N.P. Lindsey, M. Fischer, C.J. Gregory, A.F. Hinckley, P.S. Mead, G.  
727 Paz-Bailey, S.H. Waterman, N.A. Drexler, and G.J. Kersh. 2018. Vital signs:



- 728 trends in reported vectorborne disease cases—United States and Territories,  
729 2004–2016. *Morbidity and Mortality Weekly Report* 67:496.
- 730 Schmittgen, T.D., and K.J. Livak. 2008. Analyzing real-time PCR data by the  
731 comparative C T method. *Nature protocols* 3:1101.
- 732 Schuijt, T.J., J. Coumou, S. Narasimhan, J. Dai, K. DePonte, D. Wouters, M. Brouwer,  
733 A. Oei, J.J. Roelofs, and A.P. van Dam. 2011a. A tick mannose-binding lectin  
734 inhibitor interferes with the vertebrate complement cascade to enhance  
735 transmission of the lyme disease agent. *Cell host & microbe* 10:136-146.
- 736 Schuijt, T.J., S. Narasimhan, S. Daffre, K. DePonte, J.W. Hovius, C. Van't Veer, T. van  
737 der Poll, K. Bakhtiari, J.C. Meijers, and E.T. Boder. 2011b. Identification and  
738 characterization of Ixodes scapularis antigens that elicit tick immunity using yeast  
739 surface display. *PLoS One* 6:e15926.
- 740 Sherman, B.T., and R.A. Lempicki. 2009. Systematic and integrative analysis of large  
741 gene lists using DAVID bioinformatics resources. *Nature protocols* 4:44.
- 742 Singh, S., and H. Girschick. 2004. Lyme borreliosis: from infection to autoimmunity.  
743 *Clinical Microbiology and Infection* 10:598-614.
- 744 Steere, A.C., V.K. Sikand, F. Meurice, D.L. Parenti, E. Fikrig, R.T. Schoen, J.  
745 Nowakowski, C.H. Schmid, S. Laukamp, and C. Buscarino. 1998. Vaccination  
746 against Lyme disease with recombinant *Borrelia burgdorferi* outer-surface  
747 lipoprotein A with adjuvant. *New England Journal of Medicine* 339:209-215.
- 748 Svensson, E., L. Olsen, C. Mörck, C. Brackmann, A. Enejder, N.J. Faergeman, and M.  
749 Pilon. 2011. The adiponectin receptor homologs in *C. elegans* promote energy  
750 utilization and homeostasis. *PLoS One* 6:e21343.
- 751 Tilly, K., P.A. Rosa, and P.E. Stewart. 2008. Biology of infection with *Borrelia*  
752 *burgdorferi*. *Infectious disease clinics of North America* 22:217-234.
- 753 Tishinsky, J. 2012. Modulation of adipokines by n-3 polyunsaturated fatty acids and  
754 ensuing changes in skeletal muscle metabolic response and inflammation. In.
- 755 Ušaj, M.M., M. Prelec, M. Brložnik, C. Primo, T. Curk, J. Ščančar, L. Yenush, and U.  
756 Petrovič. 2015. Yeast *Saccharomyces cerevisiae* adiponectin receptor homolog  
757 Izh2 is involved in the regulation of zinc, phospholipid and pH homeostasis.  
758 *Metallomics* 7:1338-1351.
- 759 Voelker, D.R. 1997. Phosphatidylserine decarboxylase. *Biochimica et Biophysica Acta*  
760 *(BBA)-Lipids and Lipid Metabolism* 1348:236-244.
- 761 Waterhouse, A., M. Bertoni, S. Bienert, G. Studer, G. Tauriello, R. Gumienny, F.T. Heer,  
762 T.A.P. de Beer, C. Rempfer, and L. Bordoli. 2018. SWISS-MODEL: homology  
763 modelling of protein structures and complexes. *Nucleic acids research* 46:W296-  
764 W303.
- 765 Wei, Z., J.M. Peterson, and G.W. Wong. 2011. Metabolic regulation by C1q/TNF-related  
766 protein-13 (CTRP13): activation OF AMP-activated protein kinase and  
767 suppression of fatty acid-induced JNK signaling. *Journal of Biological Chemistry*  
768 286:15652-15665.
- 769 Wolf, R.M., K.E. Steele, L.A. Peterson, X. Zeng, A.E. Jaffe, M.A. Schweitzer, T.H.  
770 Magnuson, and G.W. Wong. 2016. C1q/TNF-related protein-9 (CTRP9) levels  
771 are associated with obesity and decrease following weight loss surgery. *The*  
772 *Journal of Clinical Endocrinology & Metabolism* 101:2211-2217.

- 773 Yamauchi, T., J. Kamon, Y. Ito, A. Tsuchida, T. Yokomizo, S. Kita, T. Sugiyama, M.  
774 Miyagishi, K. Hara, and M. Tsunoda. 2003. Cloning of adiponectin receptors that  
775 mediate antidiabetic metabolic effects. *Nature* 423:762-769.
- 776 Yamauchi, T., J. Kamon, Y.a. Minokoshi, Y. Ito, H. Waki, S. Uchida, S. Yamashita, M.  
777 Noda, S. Kita, and K. Ueki. 2002. Adiponectin stimulates glucose utilization and  
778 fatty-acid oxidation by activating AMP-activated protein kinase. *Nature medicine*  
779 8:1288-1295.
- 780 Yamauchi, T., Y. Nio, T. Maki, M. Kobayashi, T. Takazawa, M. Iwabu, M. Okada-Iwabu,  
781 S. Kawamoto, N. Kubota, and T. Kubota. 2007. Targeted disruption of AdipoR1  
782 and AdipoR2 causes abrogation of adiponectin binding and metabolic actions.  
783 *Nature medicine* 13:332-339.
- 784 Zheng, Q., Y. Yuan, W. Yi, W.B. Lau, Y. Wang, X. Wang, Y. Sun, B.L. Lopez, T.A.  
785 Christopher, and J.M. Peterson. 2011. C1q/TNF-related proteins, a family of  
786 novel adipokines, induce vascular relaxation through the adiponectin receptor-  
787 1/AMPK/eNOS/nitric oxide signaling pathway. *Arteriosclerosis, thrombosis, and*  
788 *vascular biology* 31:2616-2623.
- 789 Zhu, M., K. Chen, Y. Wang, Z. Guo, H. Yin, Q. Yao, and H. Chen. 2008. Cloning and  
790 partial characterization of a gene in *Bombyx mori* homologous to a human  
791 adiponectin receptor. *ACTA Biochimica Polonica* 55:241-249.  
792  
793  
794

795 **ACKNOWLEDGEMENTS**

796 This work was supported by grants from the NIH (AI126033, AI138949) and the Steven and  
797 Alexandra Cohen Foundation. We sincerely thank Ms Kathleen DePonte for her excellent  
798 technical assistance. We would like to acknowledge that figures were created using  
799 BioRender.

800

801 **AUTHOR CONTRIBUTIONS**

802 X.T. and E.F. conceived and shaped the overall direction of the project. X.T. Y.C. G.A.  
803 J.H. A.S. A.M. Y.M.C. M.J.W. C.L.B. and H.M. performed experiments. Y.C. and J.H. bred  
804 the adiponectin knockout mice. S.M. conducted RNA-seq data analyses. S.N. and U.P.  
805 was involved in the critical discussion of this study. Illustrations were created by X.T. using  
806 BioRender. X.T. and E.F. wrote the manuscript with feedback and discussions from all  
807 co-authors.

808

809 **DECLARATION OF INTEREST**

810 The authors declare no competing interests.

811

812 **LEAD CONTACT**

813 Further information and requests for resources and reagents should be directed to and  
814 will be fulfilled by the Lead Contact, Erol Fikrig (Erol.Fikrig@yale.edu)

815

816 **DATA AVAILABILITY**

817 The RNA-seq data are available in the Gene Expression Omnibus (GEO) repository at  
818 the National Center for Biotechnology Information under the accession number:  
819 GSE169293.

820 **Figure legends**

821

822 **Figure 1. Silencing of *ISARL* significantly reduces the *B. burgdorferi* burden in**  
823 **nymphal tick guts.** (A) *ISARL* is significantly induced in nymphal tick guts after feeding  
824 on *B. burgdorferi*-infected mice. (B) qPCR assessment of *ISARL* transcript levels  
825 following RNAi silencing of *ISARL* after feeding on *B. burgdorferi*-infected mice. (C)  
826 Nymphal engorgement weights in *ISARL*-silenced and mock-injected nymphs. Each data  
827 point represents one engorged tick. (D) qPCR assessment of *B. burgdorferi flaB* levels in  
828 guts following RNAi silencing of *ISARL* after feeding on *B. burgdorferi*-infected mice. Each  
829 data point represents one nymph gut. Horizontal bars in the above figures represent the  
830 median. Statistical significance was assessed using a non-parametric Mann-Whitney test  
831 (ns,  $P > 0.05$ ; \*\*,  $P < 0.01$ ; \*\*\*,  $P < 0.001$ ; \*\*\*\*,  $P < 0.0001$ ). (E) *Borrelia*-infected nymphs  
832 microinjected with ds *ISARL* or ds *GFP* were fed on clean mice to assess transmission of  
833 the spirochete. The infection of *Borrelia* in Murine skin 7,14, and 21 days after infection,  
834 and in heart and joint tissues at 21 days was determined. (F) Murine skin 7,14, and 21  
835 days after infection, and in heart and joint tissues at 21 days was determined by qPCR of  
836 *flaB* and normalized to mouse *actin*. Data represent the means  $\pm$  standard deviations from  
837 five replicates.

838

839 **Figure 2. RNA-seq, qPCR validation, and RNAi-silencing assays revealed that**  
840 **phosphatidylserine synthase 1 (*PTDSS1*) is regulated by *ISARL* and is involved in**  
841 ***B. burgdorferi* colonization.** (A) Hierarchical clustering of differentially expressed genes  
842 was generated after feeding on clean mice. (B) Hierarchical clustering of differentially  
843 expressed genes was generated after feeding on *B. burgdorferi*-infected mice. The

844 expression levels were visualized and the scale from least abundant to highest range is  
845 from -2.0 to 2.0. The phylogenetic relationships of differentially expressed genes are  
846 shown on the left tree. The top tree indicated the cluster relationship of the sequenced  
847 samples. (C) qPCR validation of *ISARL* knockdown in tick gut. Statistical significance was  
848 assessed using a Student's *t* test (\*,  $P < 0.05$ ; \*\*\*\*,  $P < 0.0001$ ). (D) Venn diagram  
849 depicting unique and common differentially expressed genes between clean and *B.*  
850 *burgdorferi*-infected mice feeding. The up arrow indicated upregulation and the down  
851 arrow indicated downregulation of differentially expressed genes. (E) Metabolism  
852 pathways inferred by GO and KEGG enrichment analyses of transcriptomes comparison  
853 between ds *GFP* and ds *ISARL* injection after feeding on *B. burgdorferi*-infected mice to  
854 repletion. (F) QPCR validation of *PTDSS1* showed that *PTDSS1* is positively regulated  
855 by *ISARL*. (G) Western blot of *PTDSS1* protein showed that *PTDSS1* is positively  
856 regulated by *ISARL* (\*\*,  $P < 0.05$ ). (H) qPCR assessment of *PTDSS1* transcript level,  
857 nymphal engorgement weights, and *B. burgdorferi flaB* levels in guts following RNAi  
858 silencing of *PTDSS1* after feeding on *B. burgdorferi*-infected mice. Each data point  
859 represents one nymph. (I) *PTDSS1* is significantly induced in the nymphal tick gut after  
860 feeding on *B. burgdorferi*-infected mice. (J) *PTDSS1* is involved in phospholipid pathway.  
861 Cytidine diphosphate diacylglycerol (CDP-DAG) is converted to phosphatidylserine (PS)  
862 by *PTDSS1*. PE: Phosphatidylethanolamine; PC: Phosphatidylcholine. (K) qPCR  
863 assessment of phosphatidylserine decarboxylase (*PSD*) transcript level, nymphal  
864 engorgement weights, and qPCR assessment of *B. burgdorferi flaB* levels in guts  
865 following RNAi silencing of *PSD* after feeding on *B. burgdorferi*-infected mice. Each data  
866 point represents one nymph. Horizontal bars in the above figures represent the median.

867 Statistical significance was assessed using a non-parametric Mann-Whitney test (ns,  $P >$   
868 0.05; \*,  $P < 0.05$ ; \*\*,  $P < 0.01$ ). Source data 1. Source data for PTDSS1 protein relative  
869 quantification. Source data 2. Source data for PTDSS1 protein relative quantification.

870  
871 **Figure 3. Mammalian adiponectin regulates tick glucose metabolism.** (A) RNA-seq

872 of injection of recombinant mouse adiponectin and GFP (control) proteins. One classic  
873 downstream gene of mammalian adiponectin receptor signaling, glucose-6-phosphatase  
874 (*G6P*), was significantly downregulated in the presence of mammalian adiponectin. (B)

875 Interaction of mammal adiponectin and adiponectin receptor suppresses *G6P* and  
876 phosphoenolpyruvate carboxykinase (*PEPCK*) expression through an AMP-activated  
877 protein kinase (AMPK)-dependent mechanism, which further inhibits glycogenolysis and

878 gluconeogenesis. (C) Injection of recombinant mouse adiponectin significantly  
879 downregulate the expression of *G6P1*, *G6P2*, *PEPCK2*, and *PEPCK3* in the tick gut. (D)  
880 Feed ticks on C57BL/6J WT and *Adipo*<sup>-/-</sup> mice and then evaluate the expression of *G6P1*,

881 *G6P2*, *PEPCK1*, *PEPCK2*, and *PEPCK3*. (E) After feeding on WT and *Adipo*<sup>-/-</sup> mice,  
882 *G6P1* and *G6P2* showed significant downregulation profile in the presence of adiponectin,  
883 while *PEPCK* genes did not exhibit marked downregulation. (F) Ticks were fed on *B.*

884 *burgdorferi*-infected WT and *Adipo*<sup>-/-</sup> mice, and then *B. burgdorferi flaB* levels in guts were  
885 assessed. (G) qPCR assessment of *B. burgdorferi* burden after feeding on *B. burgdorferi*-  
886 infected WT and *Adipo*<sup>-/-</sup> mice. No significant difference of *B. burgdorferi* burden in tick

887 gut was observed between feeding on WT and *Adipo*<sup>-/-</sup> mice. (H) Adiponectin  
888 concentration in mice sera following 21 and 28 days after injection of *B. burgdorferi* at the  
889 density of 10<sup>4</sup> and 10<sup>7</sup> cells/mL, respectively. Statistical significance was assessed using

890 a non-parametric Mann-Whitney test (ns,  $P > 0.05$ ; \*,  $P < 0.05$ ; \*\*,  $P < 0.01$ ; \*\*\*,  $P < 0.001$ ).

891

892 **Figure 4. Tick complement C1q-like protein 3 (C1QL3) is involved in ISARL**

893 **signaling pathways.** (A) Blastp of the tick genome with the human adiponectin C1Q

894 domain in NCBI generated two homologs and were annotated as complement C1q-like

895 protein 3 (C1QL3) (GenBank number: XP\_002415101) and conserved hypothetical

896 protein (GenBank number: EEC18766), respectively. These are identical proteins except

897 that C1QL3 has a signal peptide sequence. (B) *C1QL3* is significantly induced in replete

898 nymphal tick guts after feeding on *B. burgdorferi*-infected mice. (C) qPCR assessment of

899 *C1QL3* transcript levels, nymphal engorgement weights, and *B. burgdorferi flaB* levels in

900 guts following RNAi silencing of *C1QL3* after feeding on *B. burgdorferi*-infected mice. (D)

901 Human HEK293T cells were transfected with HA-tagged ISARL-expressing vector

902 (pEZT-ISARL-HA). Forty hours post transfection, the cells were examined. The results

903 showed that ISARL can be successfully expressed on the HEK293T cell membrane. The

904 white arrow indicates examples of membrane expression. (E) Western blot confirmed

905 ISARL expression in the HEK293T cells. (F) Generation of tick C1QL3 protein with

906 His/V5-tag in a *Drosophila* expression system. Recombinant protein was assessed by

907 SDS-PAGE gel and western blot. (G) C1QL3 is bound on the membrane of ISARL-

908 expressed HEK293T cells. 10 X and 20 X are the microscope magnifications. The white

909 arrow indicates one example of binding. (H) Binding of C1QL3 to ISARL as analyzed by

910 a pull-down assay. HRP V5-tag monoclonal antibody was used to detect protein. C1QL3

911 was only detected in ISARL expressed cells pellet. (I) Co-immunolocalization of ISARL

912 (green) and C1QL3 (red). The specific signal of C1QL3 protein was observed on the

913 surface of some of ISARL expressed cells, and no signal was shown on non-successfully



914 expressed cells membrane. The white arrows indicate examples of binding. Bar: 20  $\mu$ m.  
915 The plot profile of co-localization was conducted by Image J software. Source data 1.  
916 Source data for ISARL expression. Source data 2. Source data for C1QL3 protein  
917 purification. Source data 3. Source data for C1QL3 protein purification. Source data 4.  
918 Source data for binding of C1QL3 to ISARL.

919  
920 **Figure 5. C1QL3 plays a role on the activation of ISARL by *Borrelia*.** (A) Analysis of  
921 how silencing of *C1QL3* influences *ISARL* expression after feeding on *B. burgdorferi*-  
922 infected mice. (B) qPCR assessment showed that *ISARL* transcript levels following RNAi  
923 silencing of *C1QL3* were significantly lower than that in control ds *GFP*-injected tick guts  
924 after feeding on *B. burgdorferi*-infected mice. (C) qPCR assessment showed that a blood  
925 meal containing *B. burgdorferi* did not significantly increase expression of *ISARL* in the  
926 nymphal tick guts as compared to feeding on clean mice after RNAi silencing of *C1QL3*.  
927 Each data point represents one nymph. Horizontal bars in the above figures represent  
928 the median. Statistical significance was assessed using a non-parametric Mann-Whitney  
929 test (ns,  $P > 0.05$ ; \*,  $P < 0.05$ ).

930

931 Figure 1

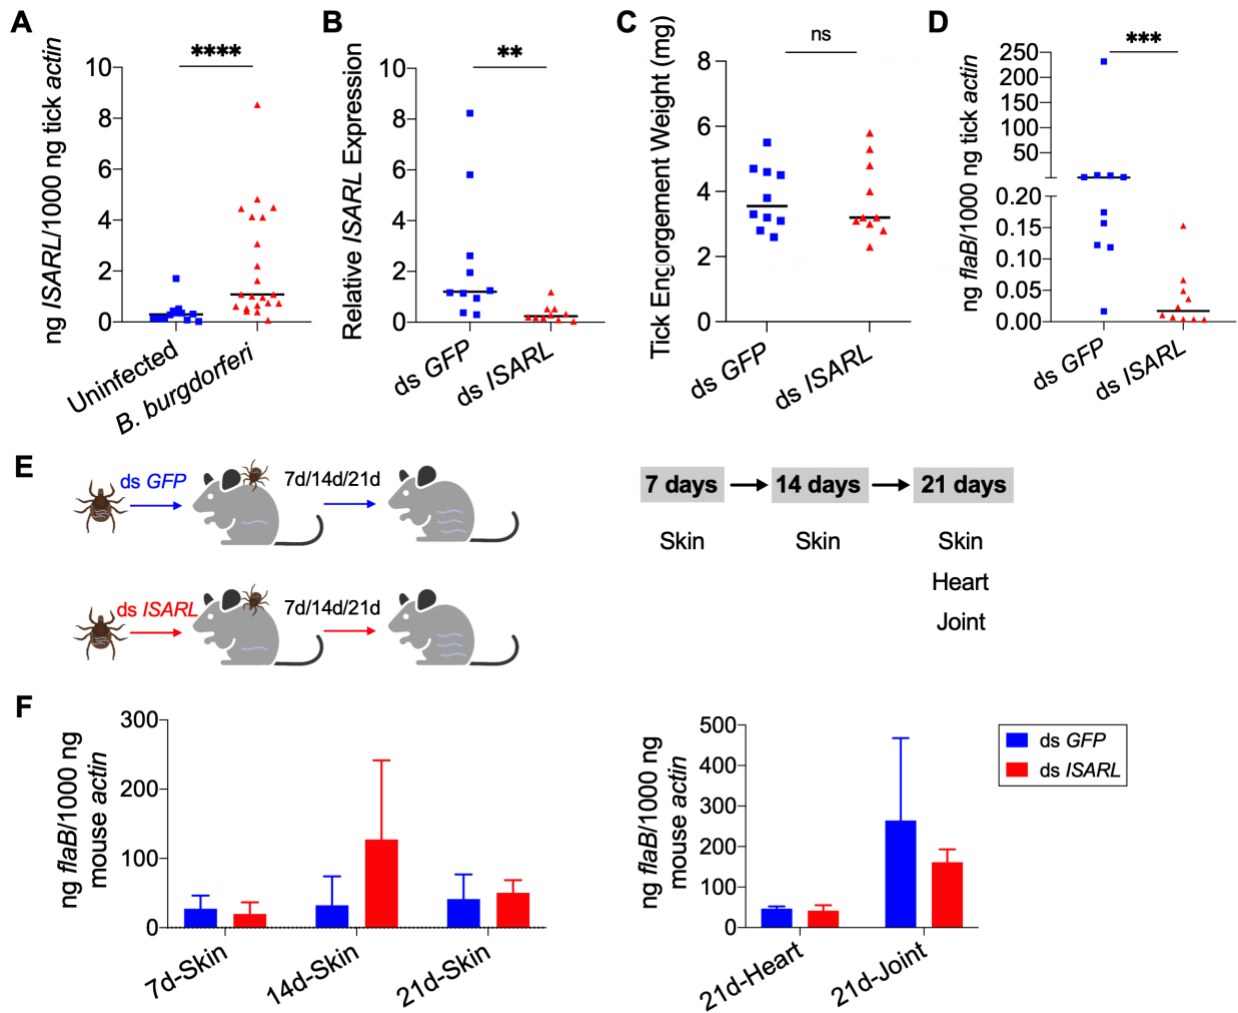

932

933

934

935 Figure 2  
936

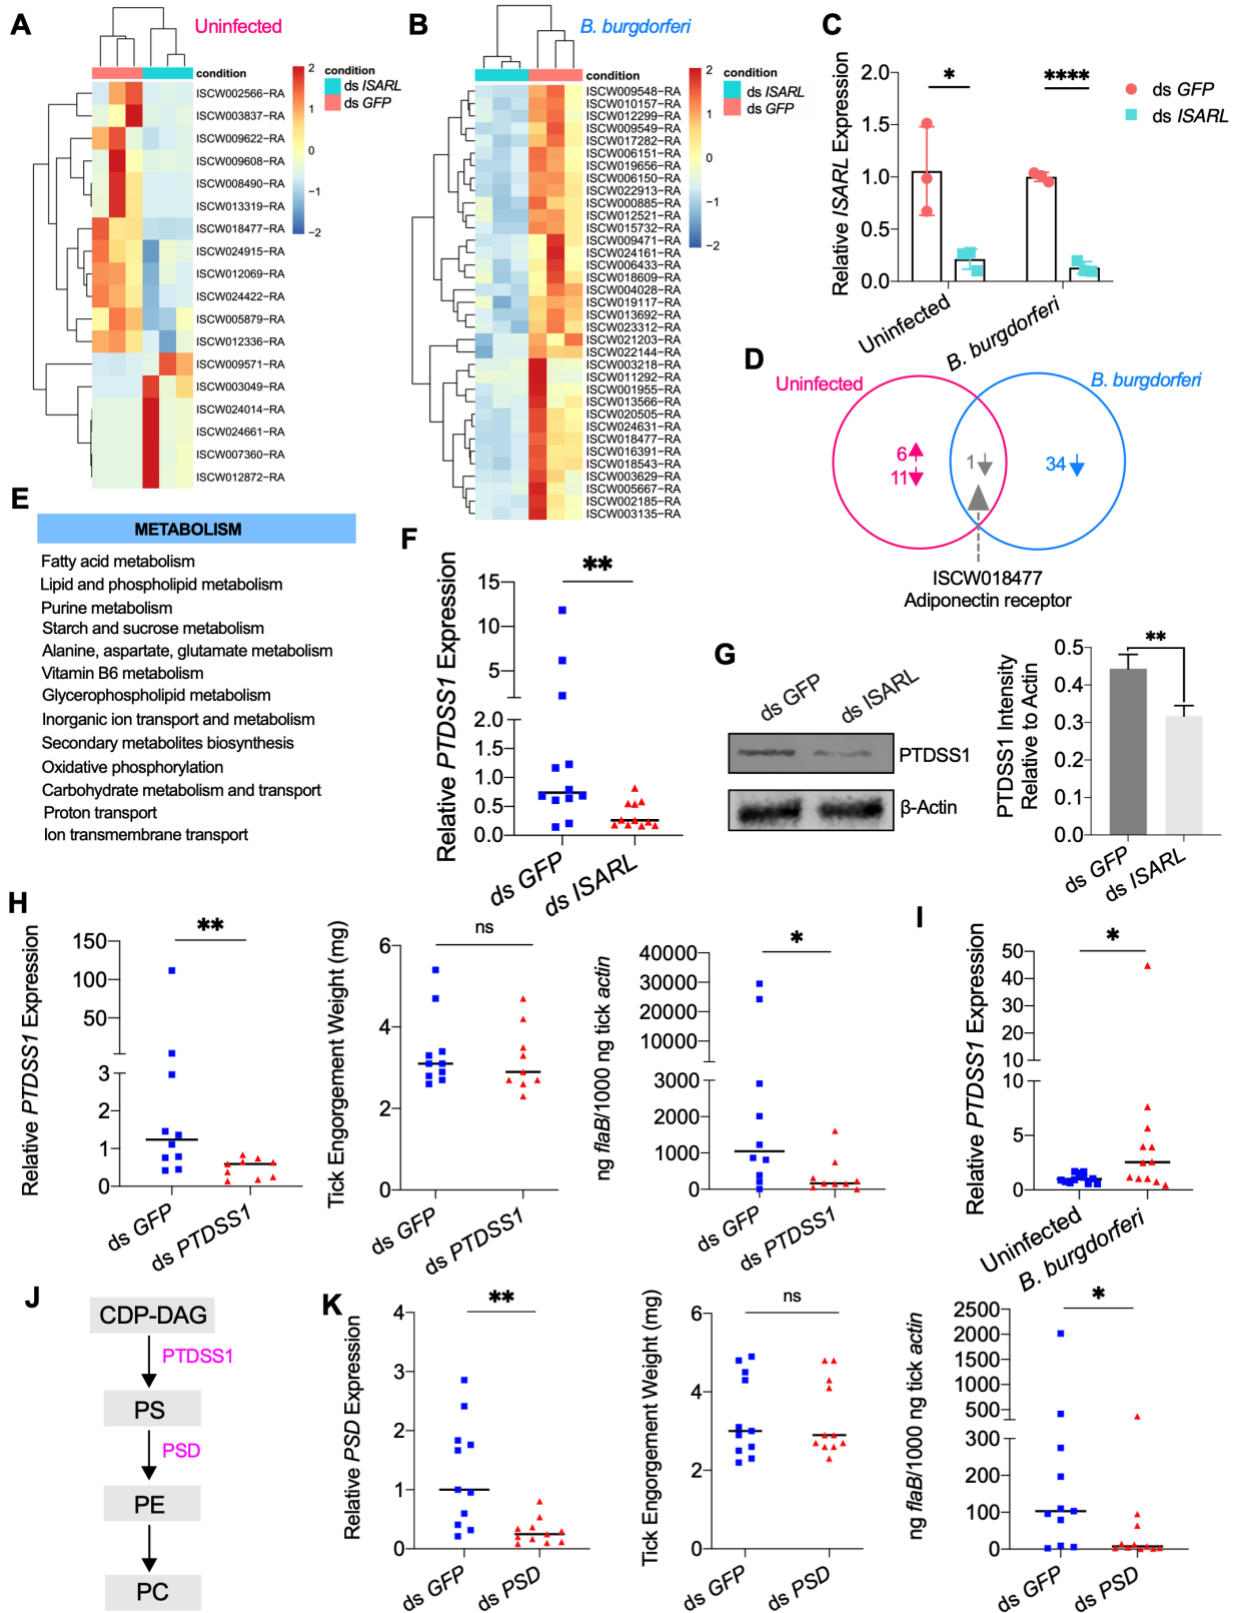

937

938 Figure 3  
939

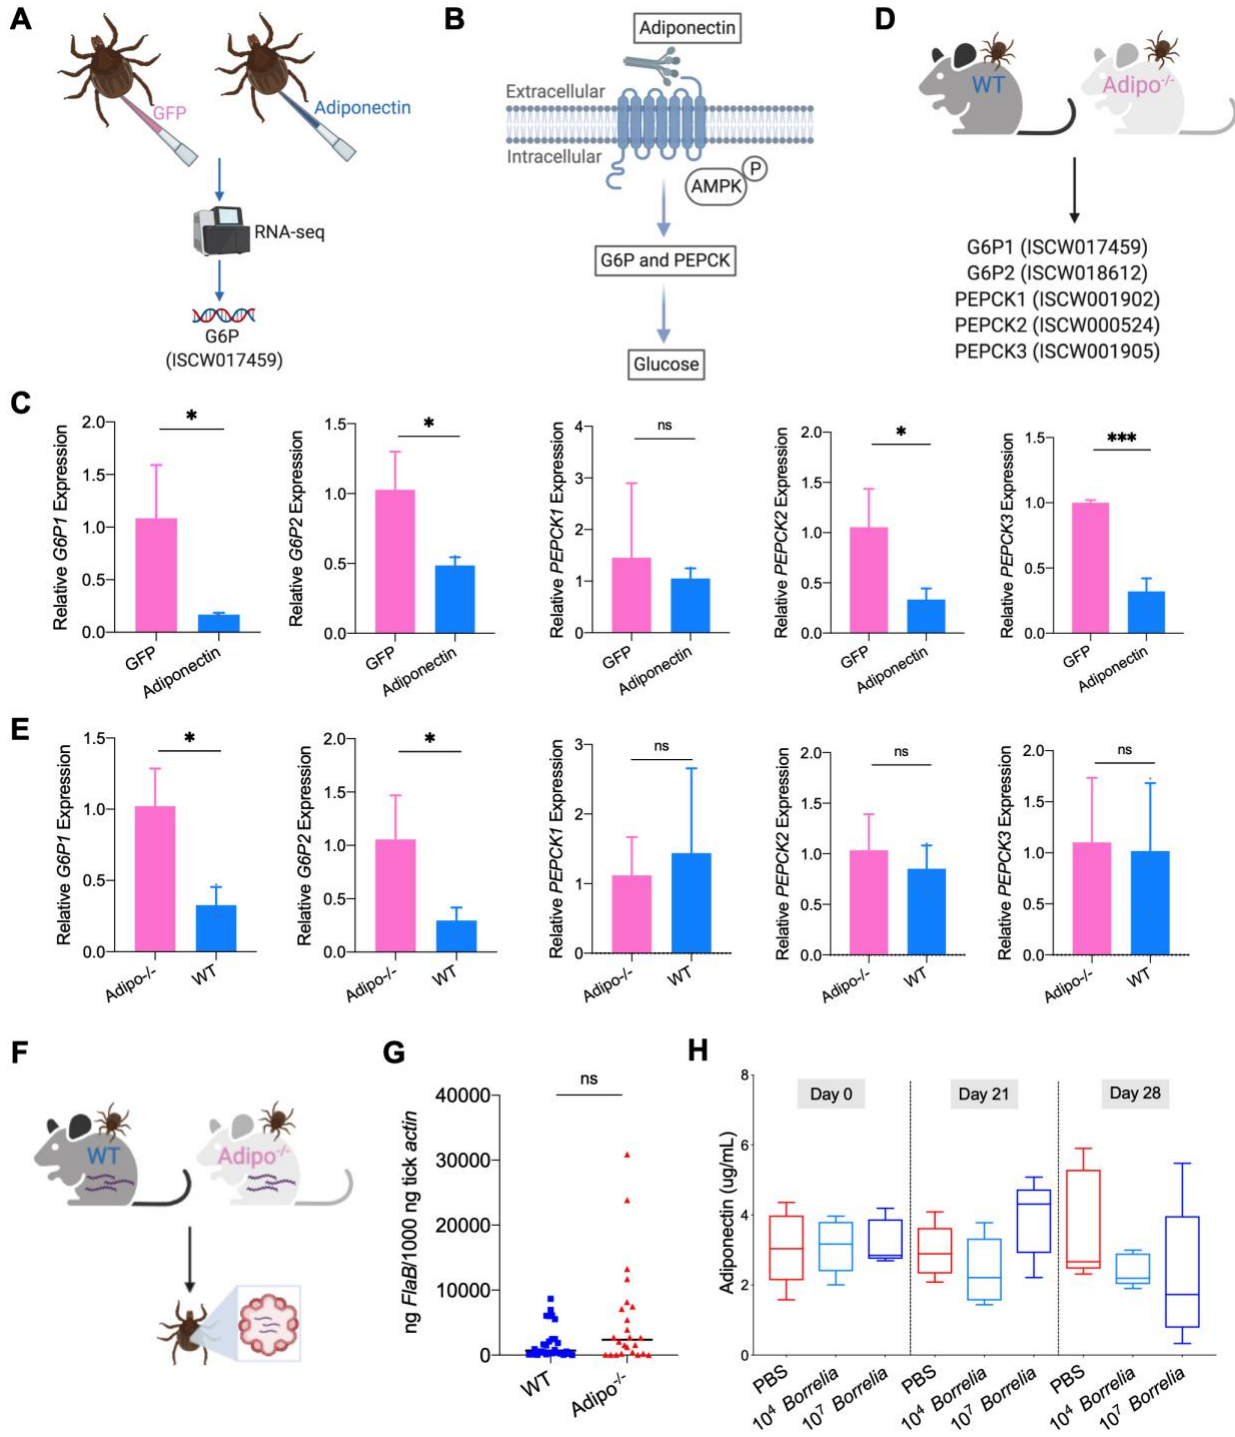

940  
941  
942  
943  
944  
945

946 Figure 4  
947

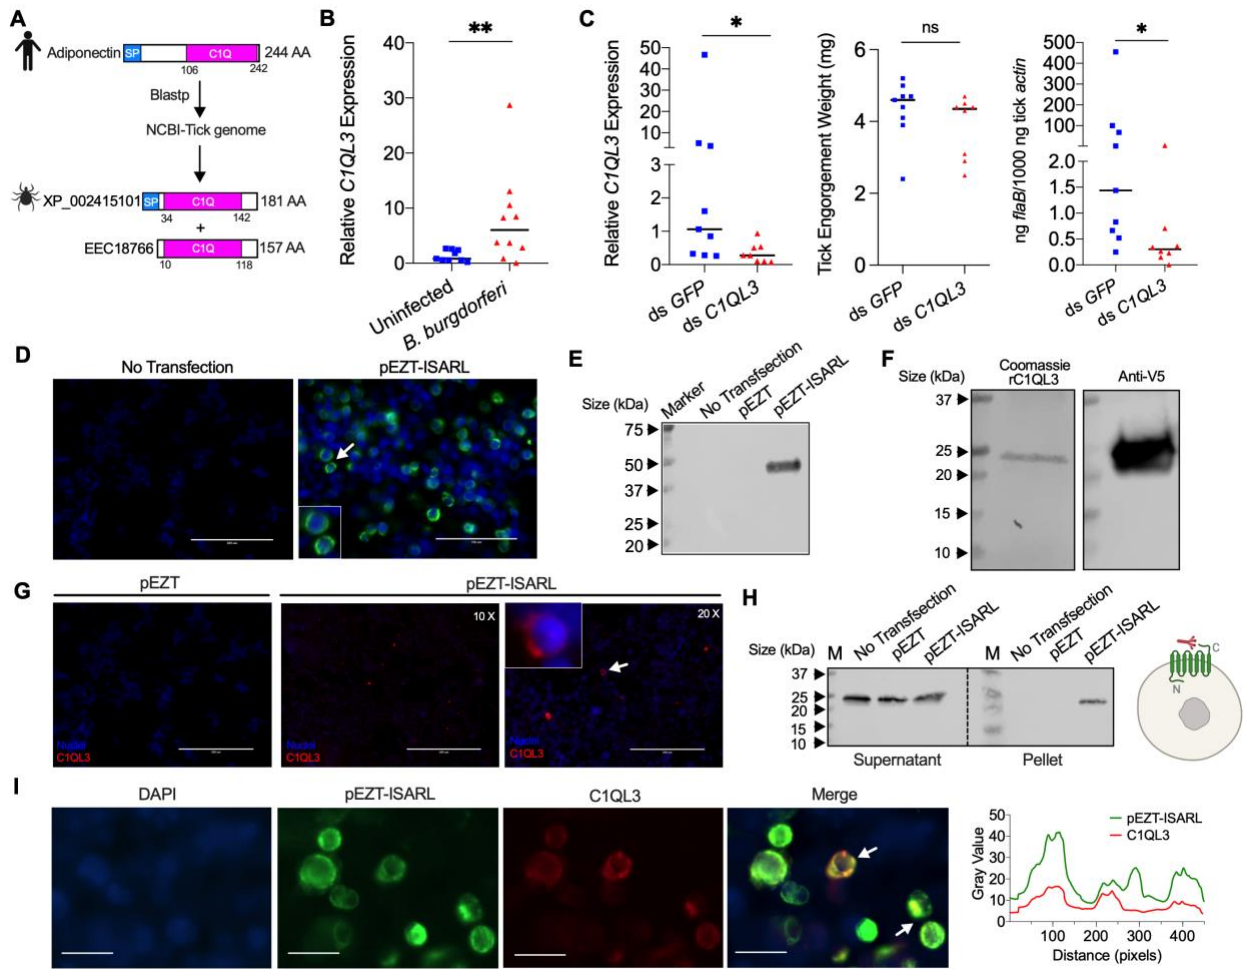

948  
949  
950

951 Figure 5  
952

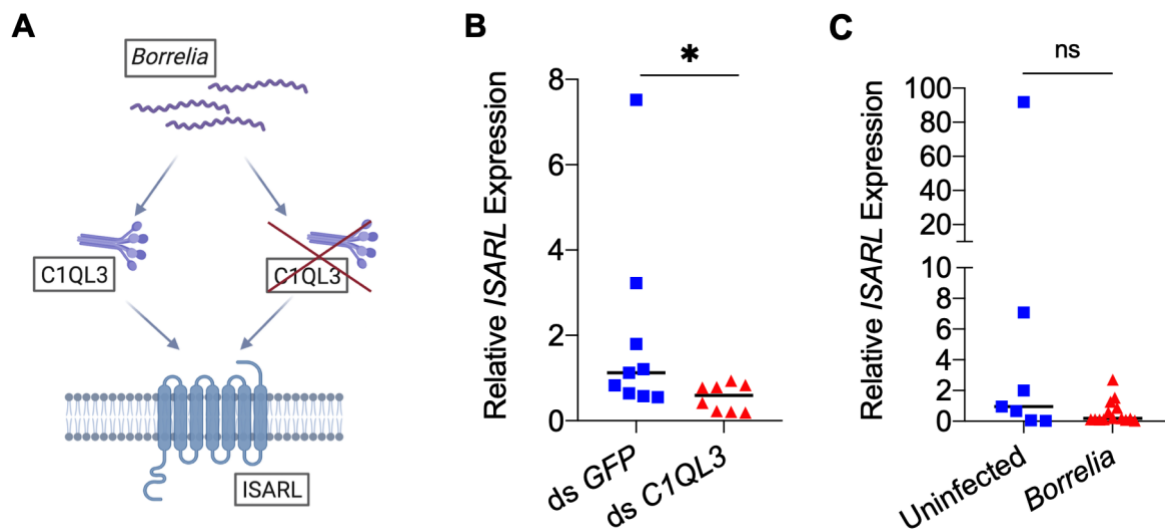

953

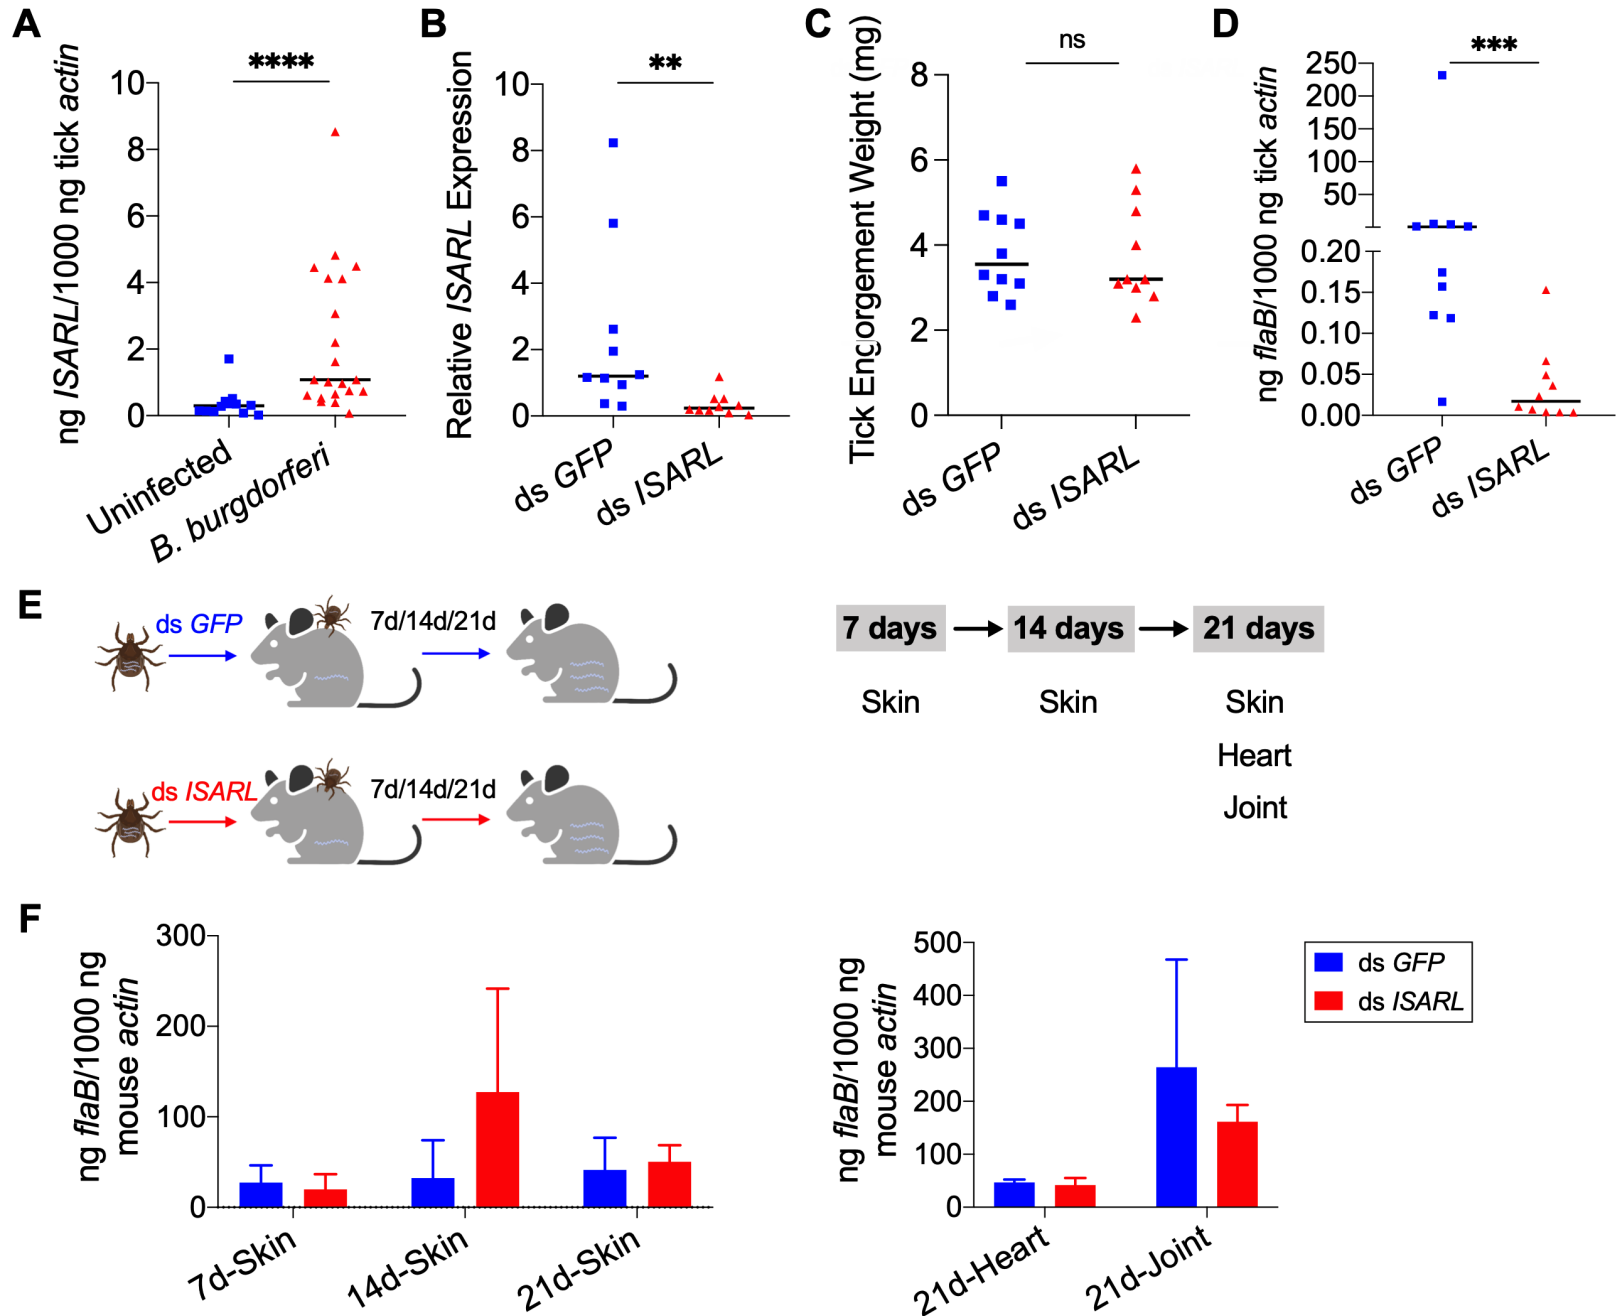



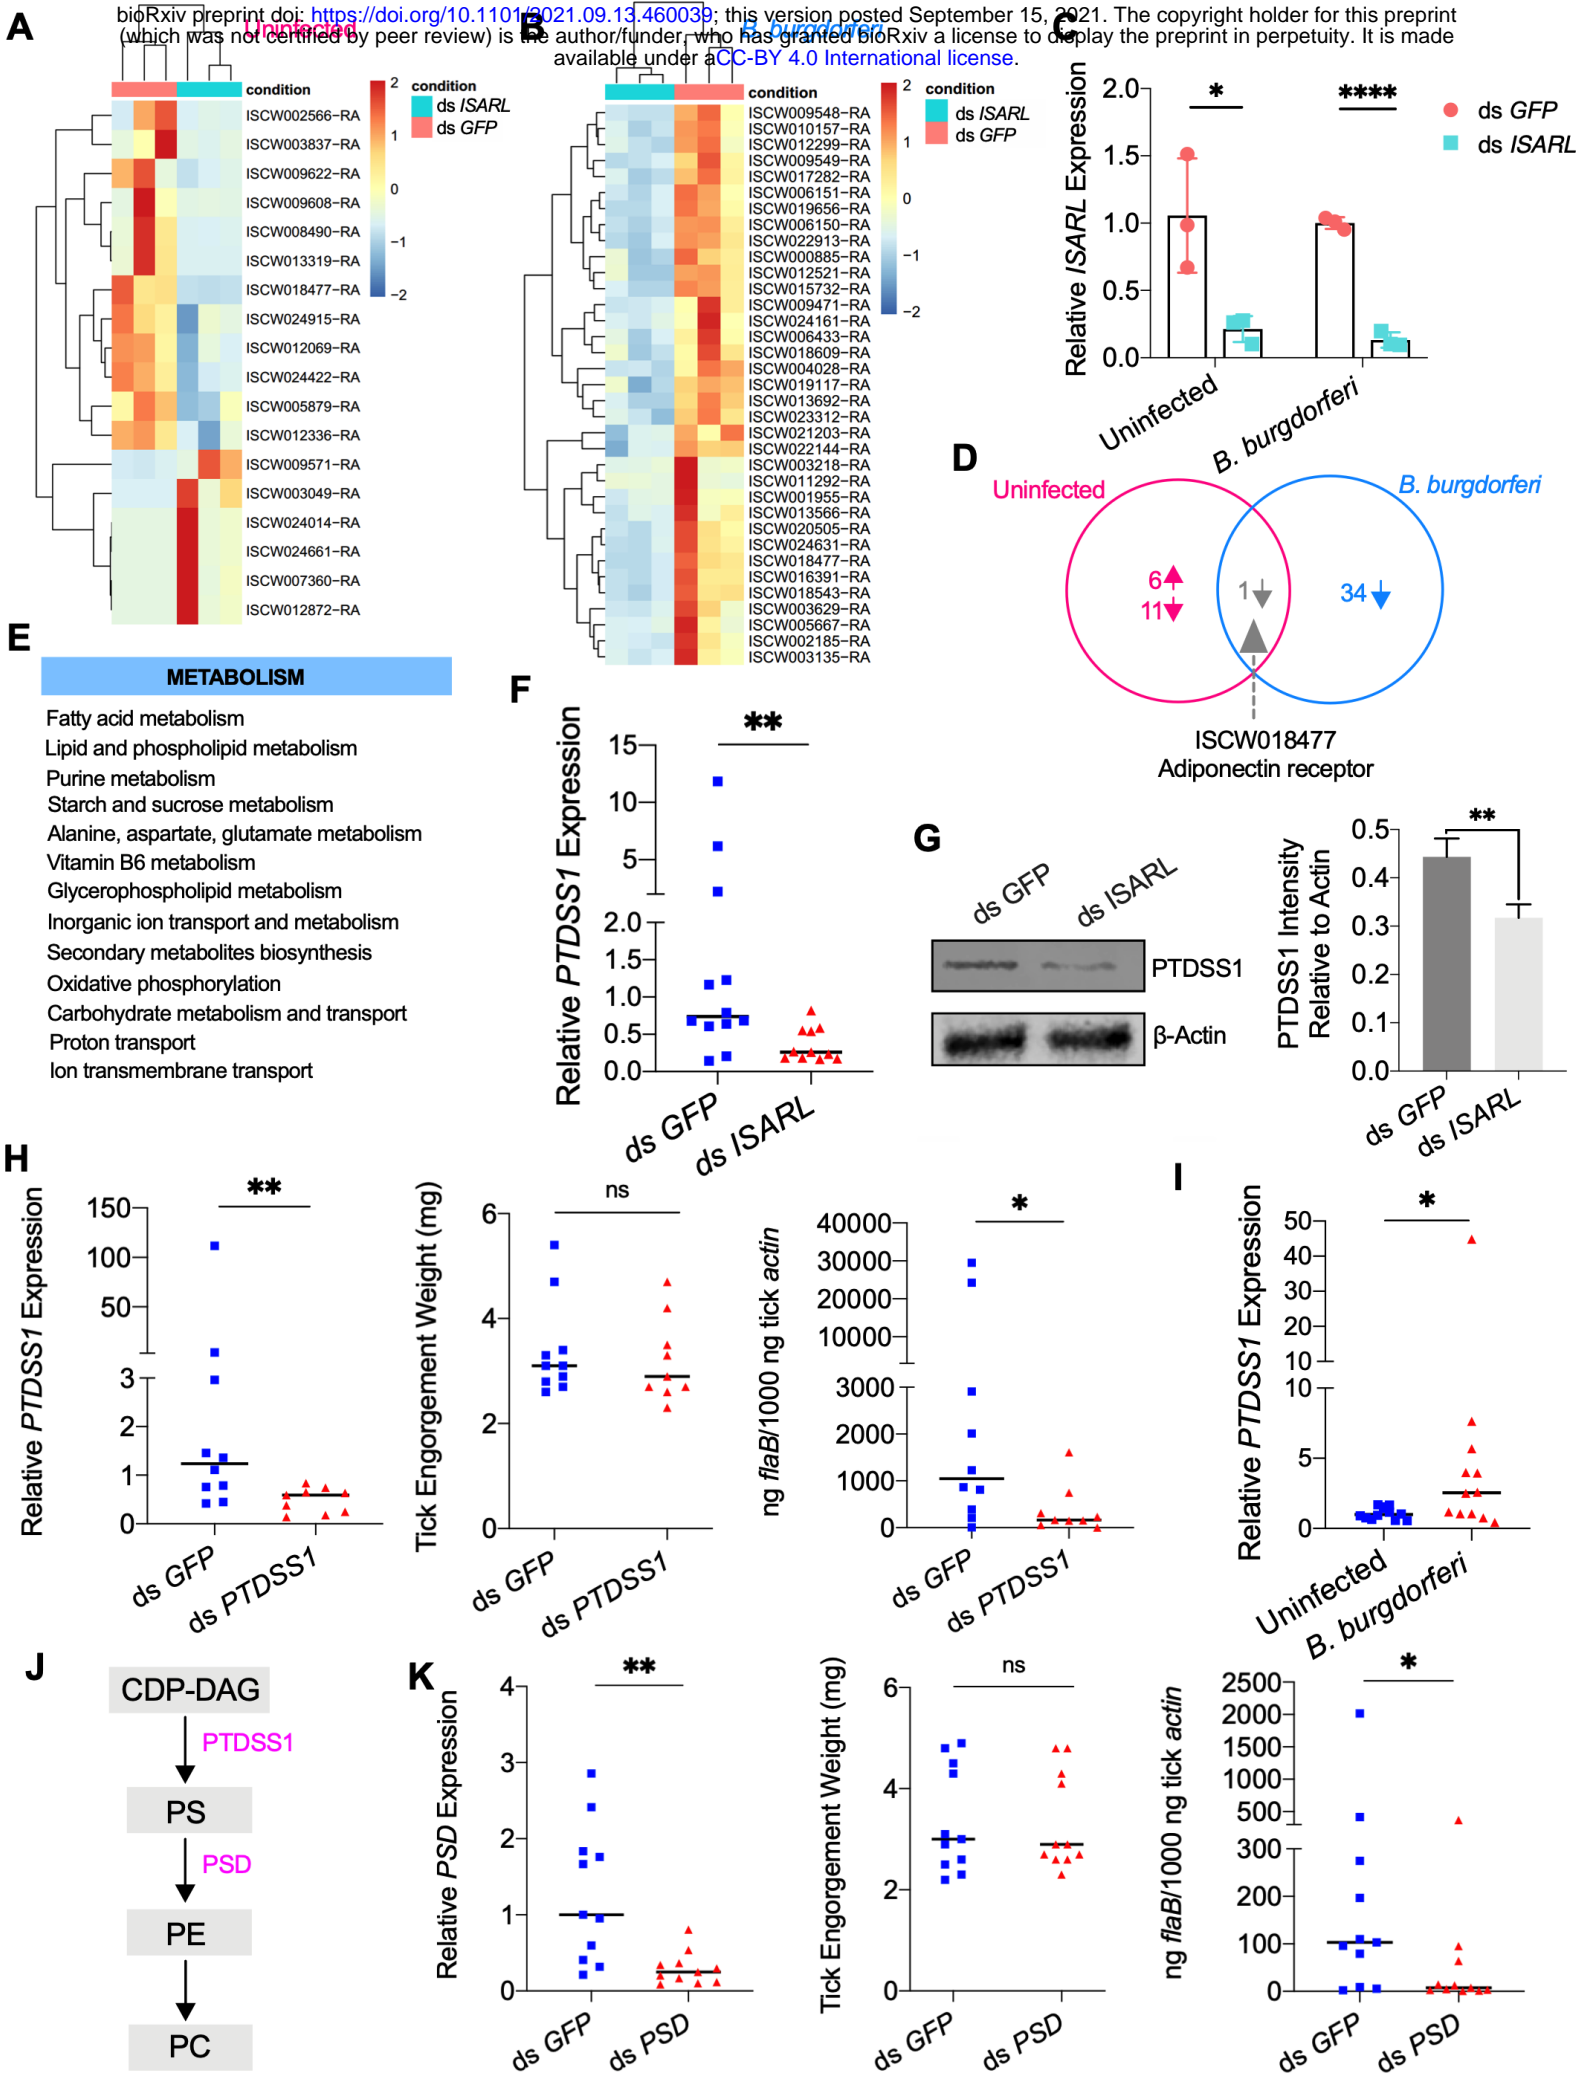



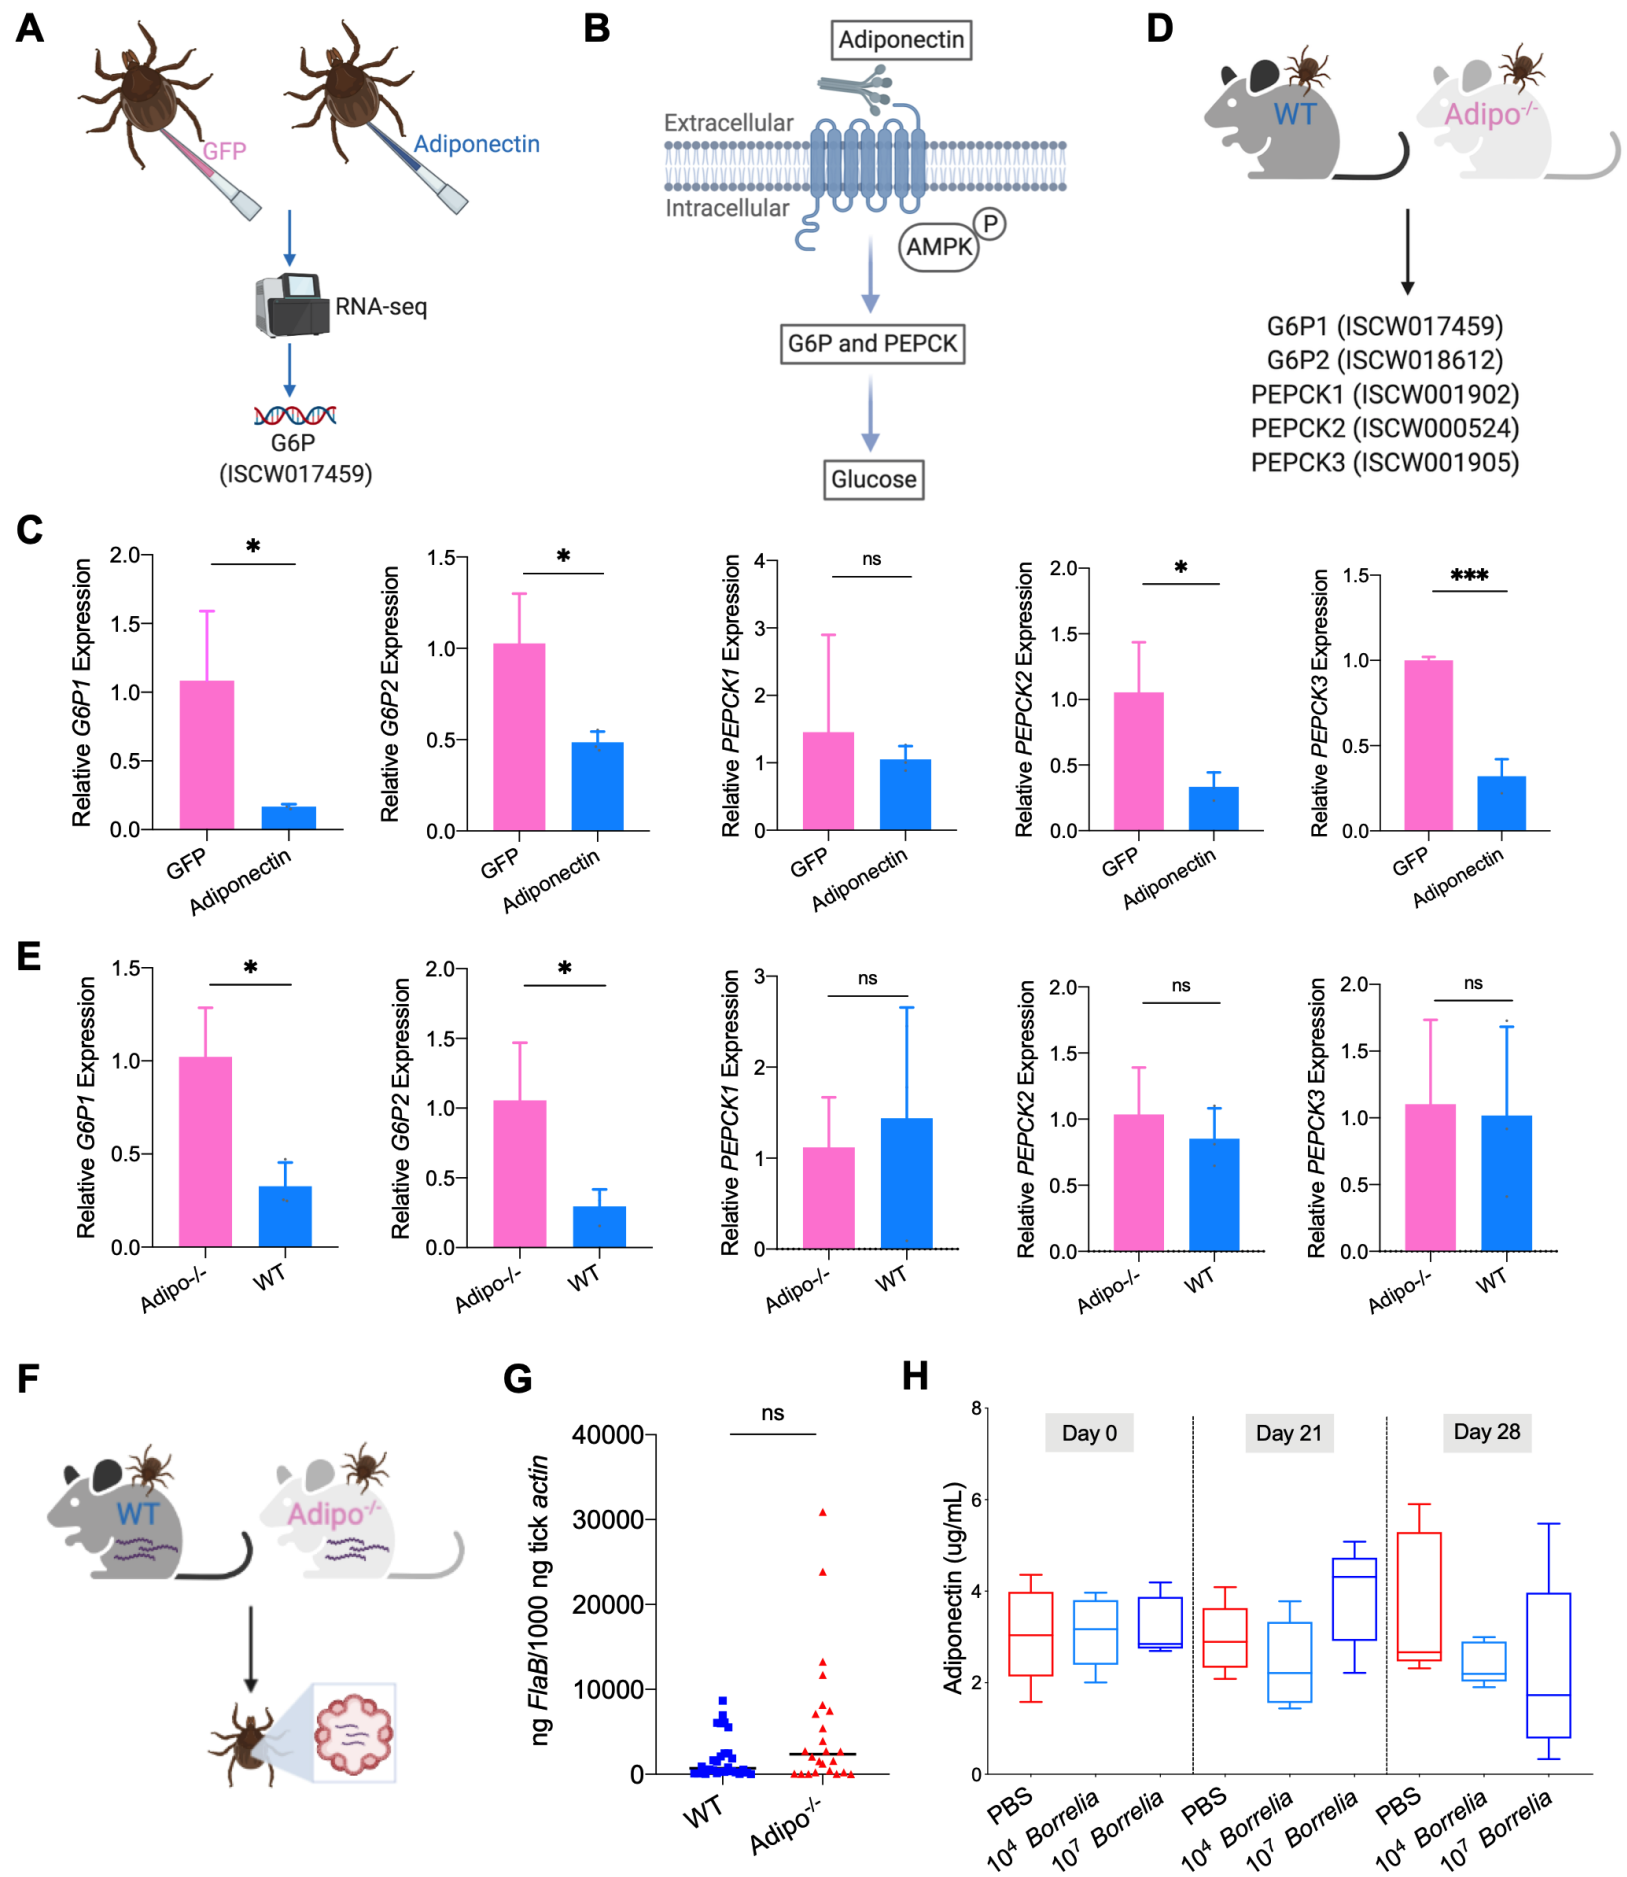

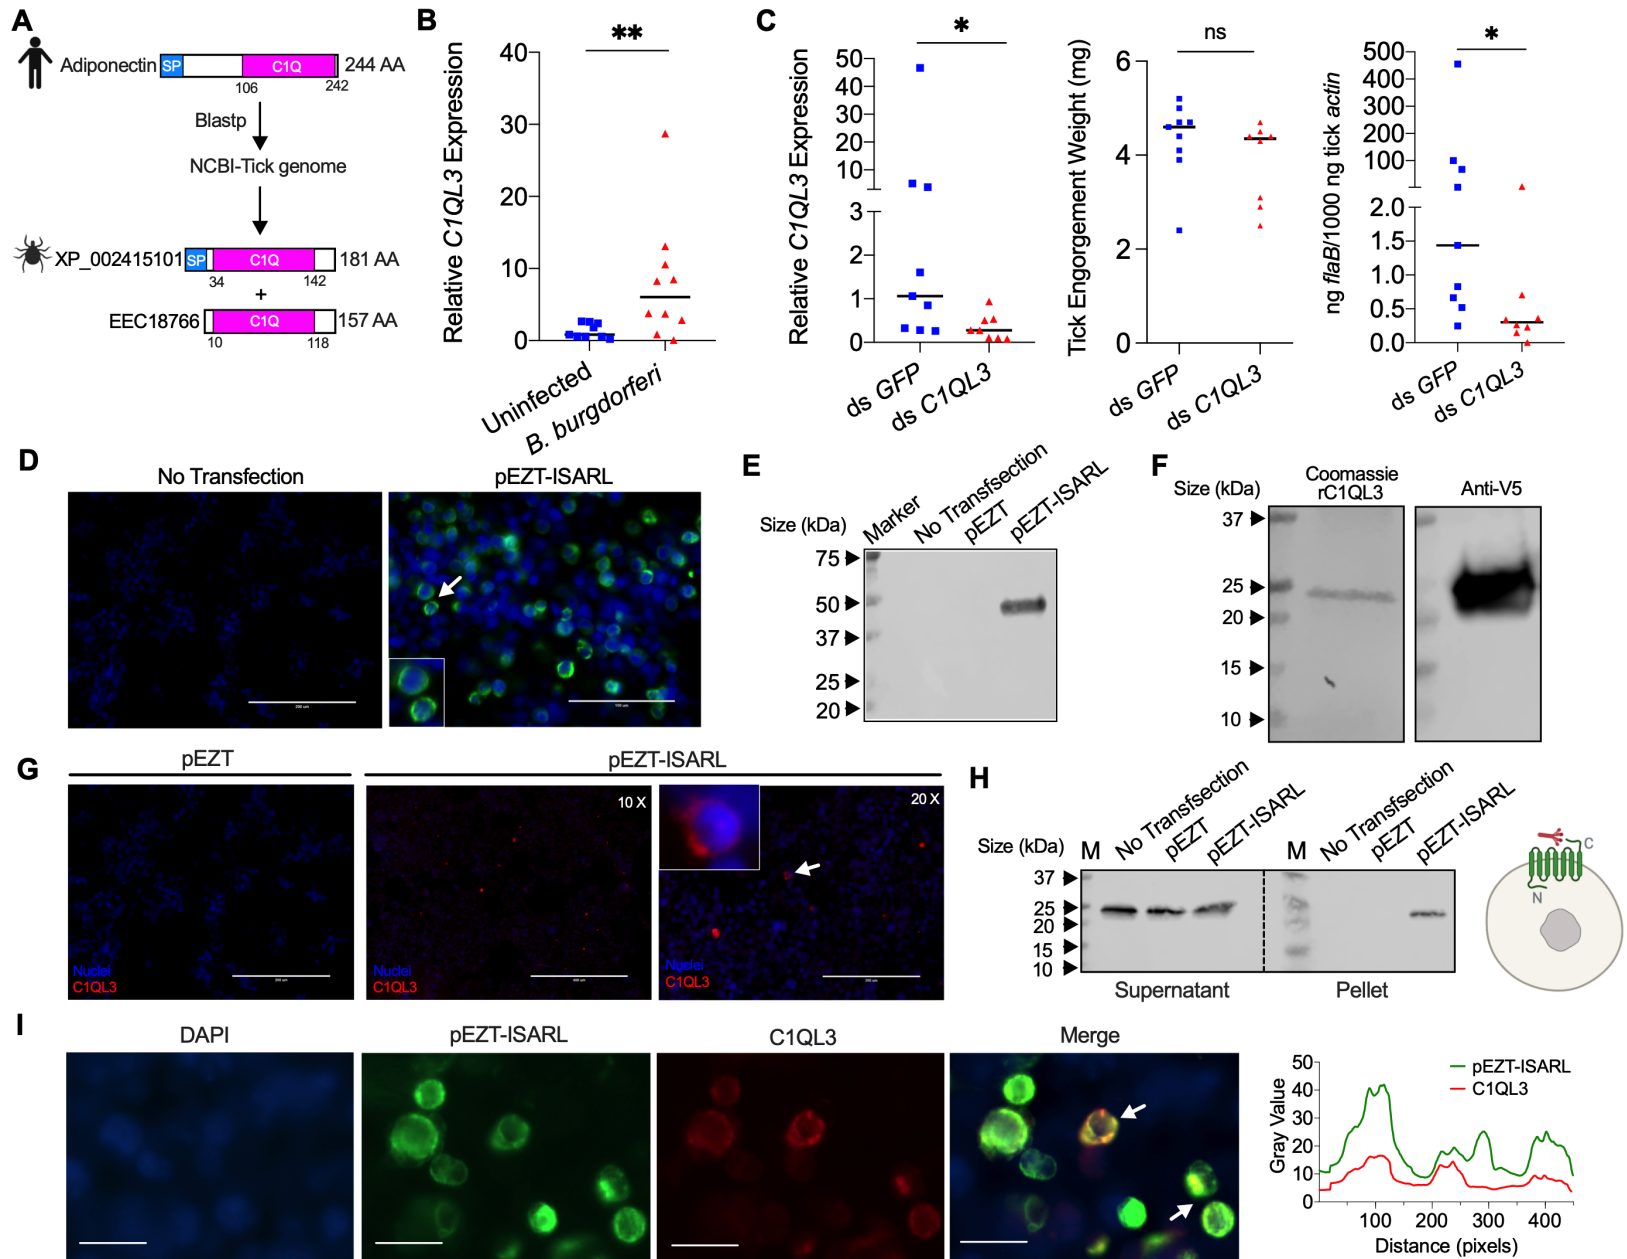

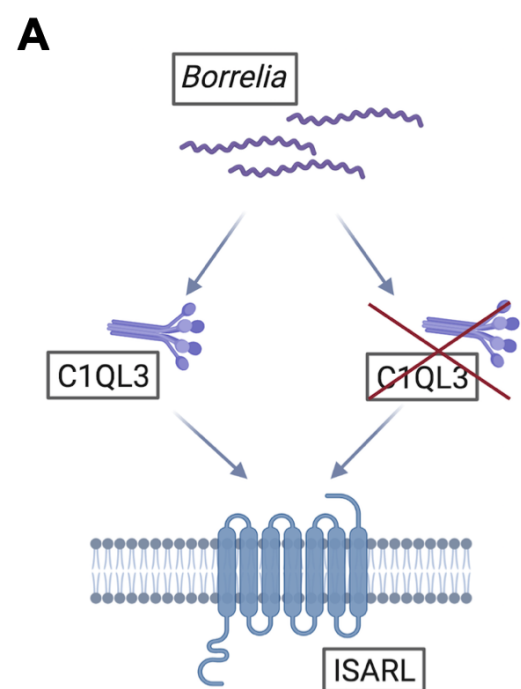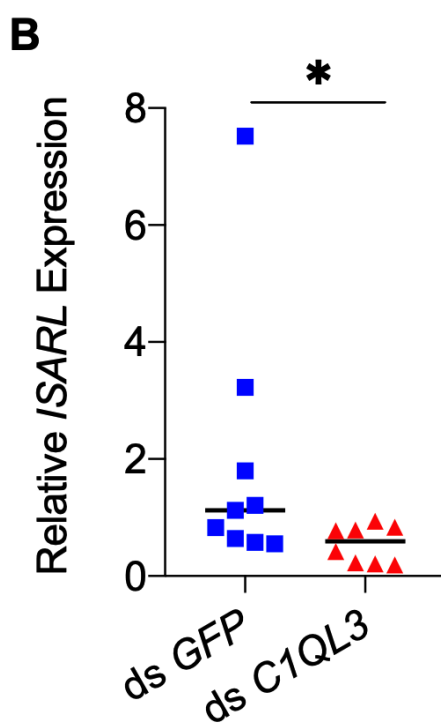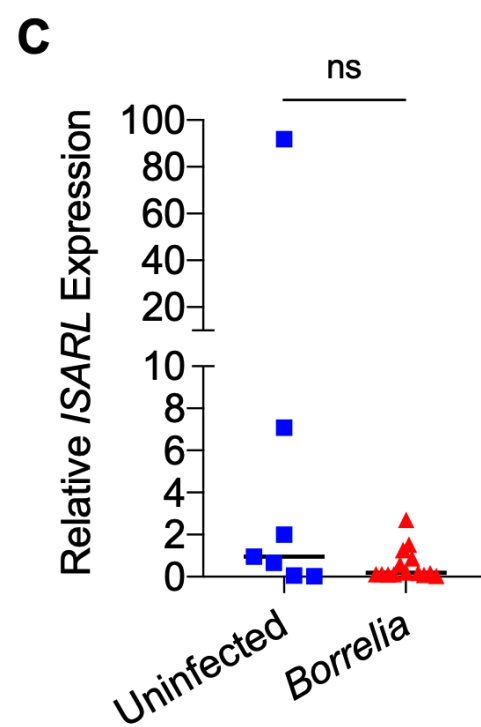



positions which have a single, fully conserved residue (dark grey). : indicates conservation between groups of strongly similar properties (light grey). . indicates conservation between groups of weakly similar properties (white grey). The TM domains is based on the experimentally defined human adiponectin receptors.



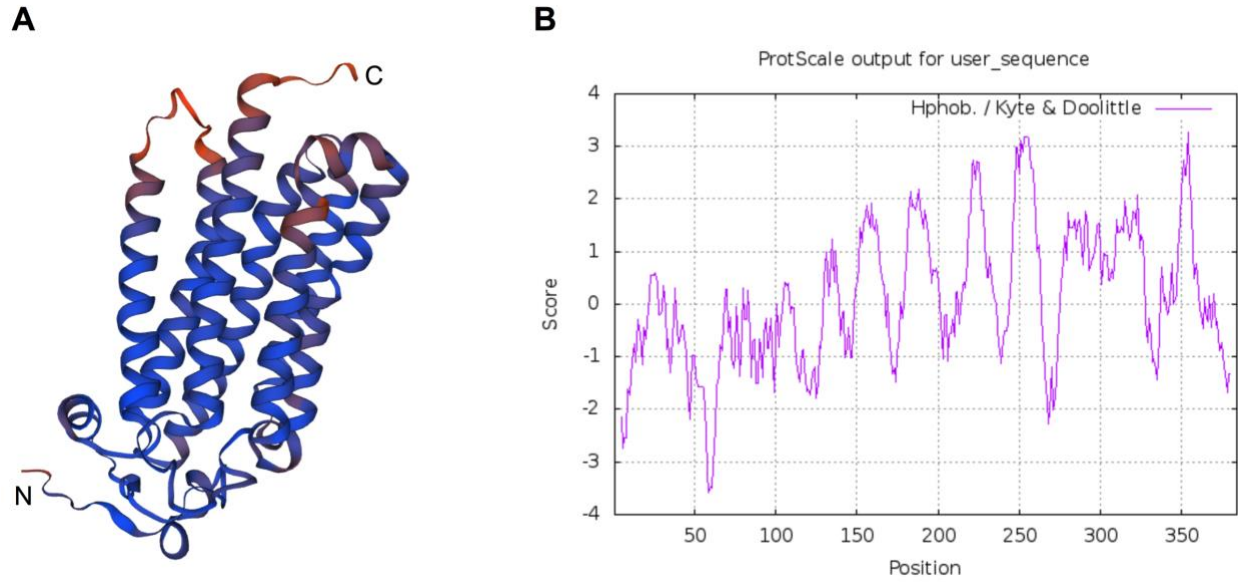

**Figure S2. Predicted protein structure and hydrophobicity of ISARL.** Seven transmembrane (TM) domains were identified in the ISARL protein based on (A) protein structure prediction and (B) hydrophobicity analysis.

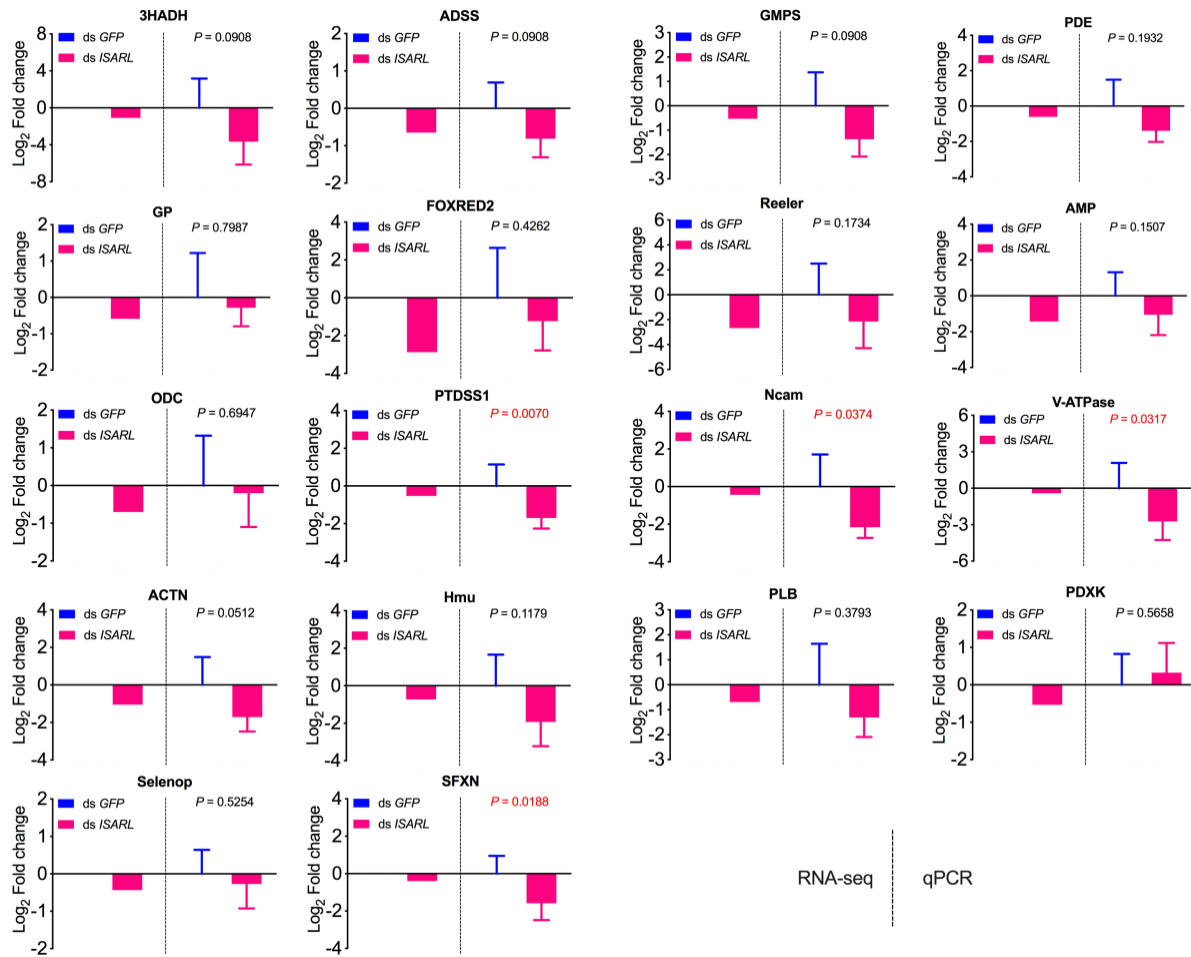

**Figure S3. QPCR validation of 18 well-annotated and metabolism-related differentially expressed genes.** 3HADH, 3-hydroxyacyl-CoA dehydrogenase, putative; ADSS, Adenylosuccinate synthetase; GMPS, GMP synthase, putative; PDE, cAMP and cAMP-inhibited cGMP 3,5-cyclic phosphodiesterase; GP, glycogen phosphorylase; FOXRED2, FAD dependent oxidoreductase domain-containing protein 2; Reeler, Secreted protein with Reeler domain; AMP, AMP dependent CoA ligase; ODC, Oxodicarboxylate carrier protein; PTSS1, Phosphatidylserine synthase I; Ncam, N-CAM Ig domain-containing protein; V-ATPase, vacuolar H<sup>+</sup>-ATPase V1 sector, subunit G; ACTN, Alpha-actinin, putative; Hmu, Hemomucin, putative; PLB, Phospholipase B-like;

PDXK, Pyridoxine kinase, putative; Selenop, selenoprotein P precursor; SFXN, sideroflexin 1,2,3, putative.



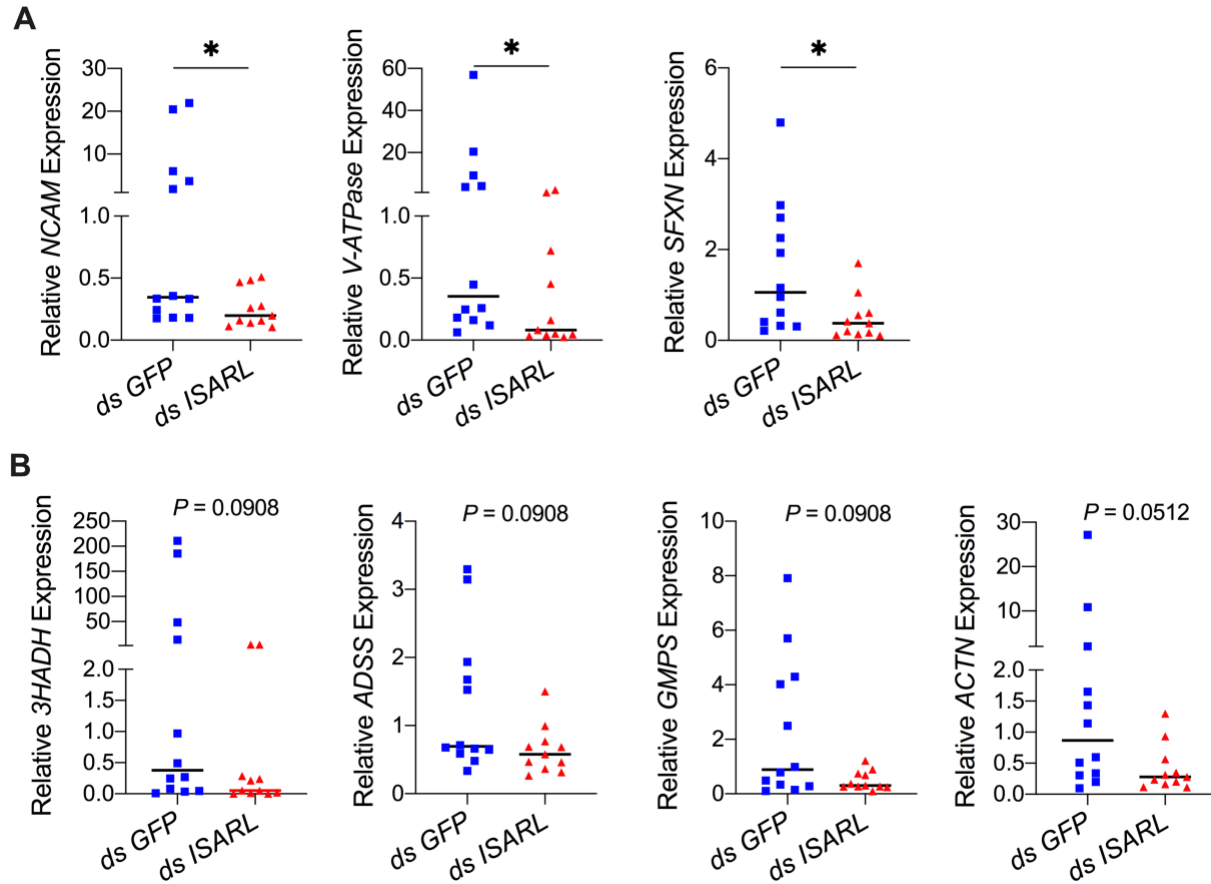

**Figure S4. QPCR validation of differentially expressed genes from the RNA-seq dataset.** (A) N-CAM Ig domain-containing protein (*NCAM*), Vacuolar H<sup>+</sup>-ATPase V1 sector, subunit G (*V-ATPase*), and Sideroflexin 1,2,3, putative (*SFXN*) were significantly downregulated following RNAi silencing of *ISARL* after feeding on *B. burgdorferi*-infected mice. (B) 3-hydroxyacyl-CoA dehydrogenase, putative (*3HADH*), Adenylosuccinate synthetase (*ADSS*), GMP synthase, putative (*GMPS*), and Alpha-actinin, putative (*ACTN*) were downregulated following RNAi silencing of *ISARL* after feeding on *B. burgdorferi*-infected mice (*P*-values are close to significant of 0.05). Each data point represents one nymph gut. Horizontal bars in the above figures represent the median. Statistical significance was assessed using a non-parametric Mann-Whitney test (\*, *P* < 0.05).

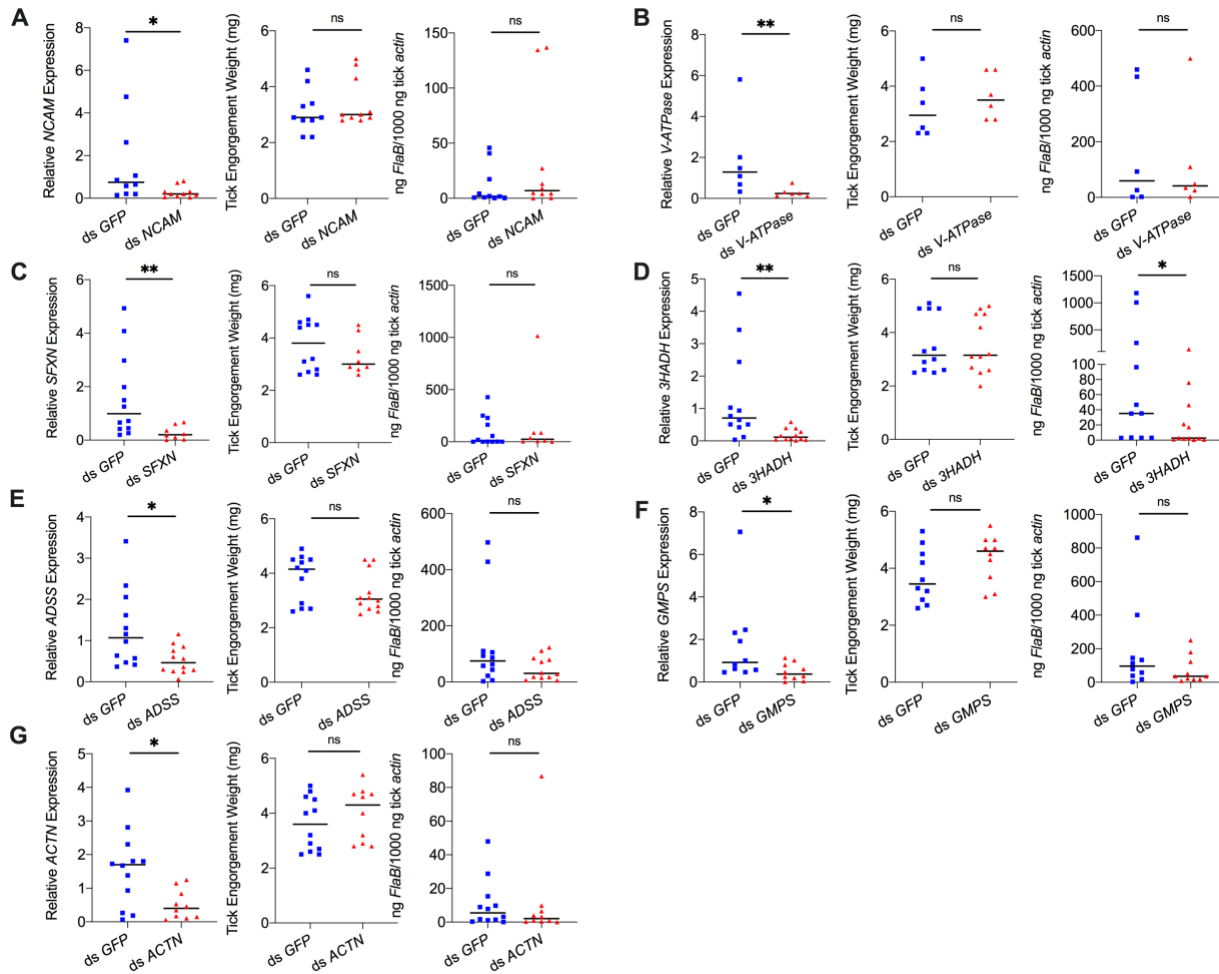

**Figure S5. Silencing of differentially expressed genes and effects on *B. burgdorferi* acquisition.** Silencing of (A) *NCAM*, (B) *V-ATPase*, (C) *SFXN*, (E) *ADSS*, (F) *GMPS*, and (G) *ACTN* has no effect on *B. burgdorferi* acquisition. Silencing of (D) *3HADH* decreased the *B. burgdorferi* burden in tick gut. *3HADH* is involved in fatty acid metabolic processes, suggesting that tick fatty acid metabolism may also influence acquisition of *B. burgdorferi*. *3HADH* is not significantly regulated by ISARL, it was not considered further in this study. Each data point represents one nymph gut. Horizontal bars in the above figures represent the median. Statistical significance was assessed using a non-parametric Mann-Whitney test (ns,  $P > 0.05$ ; \*,  $P < 0.05$ ; \*\*,  $P < 0.01$ ).

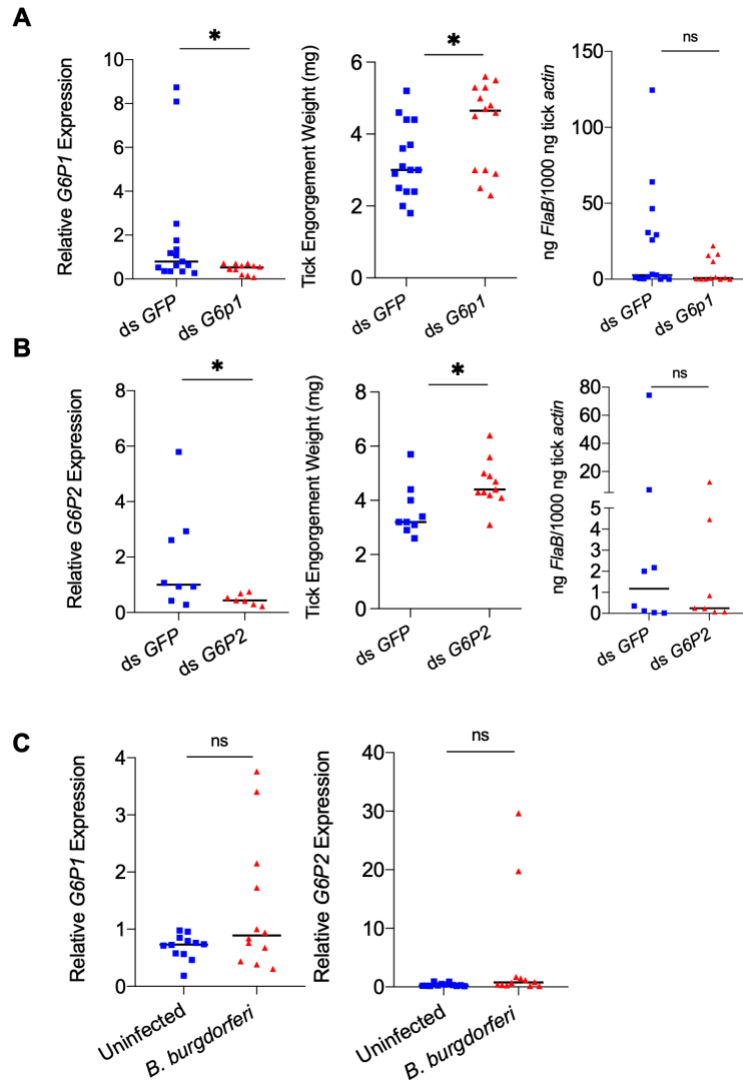

**Figure S6. Mammalian adiponectin and tick glucose metabolism changes have no effect on *B. burgdorferi* acquisition.** (A) qPCR assessment of *G6P1* transcript level, nymphal engorgement weights, and qPCR assessment of *B. burgdorferi flaB* levels in guts following RNAi silencing of *G6P1* after feeding on *B. burgdorferi*-infected mice. (B) qPCR assessment of *G6P2* transcript level, nymphal engorgement weights, and qPCR assessment of *B. burgdorferi flaB* levels in guts following RNAi silencing of *G6P2* after feeding on *B. burgdorferi*-infected mice. (C) qPCR assessment of *G6P1* and *G6P2*

transcript level in nymphal tick gut after feeding on clean and *B. burgdorferi*-infected mice  
(ns,  $P > 0.05$ ; \*,  $P < 0.05$ ).

```
>>QUERY (108 aa)
Waterman-Eggert score: 157; 53.3 bits; E(1) < 1.3e-12
28.8% identity (64.0% similar) in 111 aa overlap (25-134:1-108)
Sequence Lookup General re-search Pairwise alignment
```

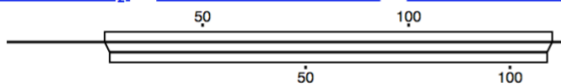

[Domains]

[alignment]

```

      30      40      50      60      70      80      90      100
QUERY  IRFTKIFYNQNHVDGSGTKFHCNIPGLYYFAYHITVYMK-DVKVSLFKKDKAMLFITYDQYQENNVDQASGSVLLHLEVG
      .:.:. .:. . . : :.:.:.:.:. . . . :.:. . . . . . :. . :.:.:.:. .
QUERY  VRFNQAPTNMQAEITKDLGAFRCVPGLYFFSFSAMAPSRGSRVSLRRNRVPPVVTAFASH--NGFSWASNSAVLYLAPN
      10      20      30      40      50      60      70

      110      120      130
QUERY  DQVWLQVYGEGERNGLYADNDNDSTFTGFL
      : :. . :. . :. . :.:.:.
QUERY  DLVYLYLE-EGDLYESSAQNRAFTSFSGFLV
      80      90      100
```

**Figure S7. Alignment of human adiponectin C1Q domain and C1QL3 C1Q domain.**

Tick C1QL3 C1Q domain has 64.0% similarity and 28.8% identity with human adiponectin C1Q domain. The alignment was conducted in LALIGN/PLALIGN ([https://fasta.bioch.virginia.edu/fasta\\_www2/fasta\\_www.cgi?rm=lalign&pgm=lal](https://fasta.bioch.virginia.edu/fasta_www2/fasta_www.cgi?rm=lalign&pgm=lal)).

**Table S1. Summary of differently expressed genes of comparison between ds *GFP* and ds *ISARL* injection after 96h feeding on clean mice.**

| Gene          | Annotation                                                       | Gene Name  | GO function                                                                                 | Log2FoldChange | P-value  |
|---------------|------------------------------------------------------------------|------------|---------------------------------------------------------------------------------------------|----------------|----------|
| ISCW003049-RA | Soluble maltase-glucoamylase, putative (Fragment)                | MGA        | carbohydrate metabolic process                                                              | 6.956779911    | 3.80E-06 |
| ISCW007360-RA | Gamma glutamyl transpeptidase, putative                          | GGT        | glutathione catabolic process                                                               | 6.22827548     | 5.26E-07 |
| ISCW024014-RA | Gamma glutamyl transpeptidase, putative (Fragment)               | GGT        | glutathione catabolic process                                                               | 6.190152254    | 5.27E-06 |
| ISCW024661-RA | Gamma glutamyl transpeptidase, putative (Fragment)               | GGT        | glutathione catabolic process                                                               | 6.190152254    | 5.27E-06 |
| ISCW012872-RA | Gamma-glutamyltransferase, putative (Fragment)                   | GGT        | glutathione catabolic process                                                               | 6.012757202    | 2.94E-11 |
| ISCW009571-RA | Uncharacterized protein (Fragment) REX4, RNA                     | ISCW009571 | N/A                                                                                         | 3.298128524    | 2.41E-05 |
| ISCW024915-RA | exonuclease 4 ( <i>S. cerevisiae</i> ) family protein (Fragment) | REX4       | nucleic acid binding                                                                        | -0.549991457   | 2.24E-05 |
| ISCW024422-RA | Superoxide dismutase, putative                                   | SOD        | removal of superoxide radicals                                                              | -1.11031654    | 5.27E-05 |
| ISCW012336-RA | Superoxide dismutase [cu-zn], putative                           | CuZnSOD    | removal of superoxide radicals                                                              | -1.117657247   | 3.62E-05 |
| ISCW005879-RA | Uncharacterized protein                                          | ISCW005879 | N/A                                                                                         | -1.608105744   | 1.35E-05 |
| ISCW012069-RA | Uncharacterized protein                                          | ISCW012069 | N/A                                                                                         | -1.810228584   | 2.52E-06 |
| ISCW009622-RA | Uncharacterized protein                                          | ISCW009622 | N/A                                                                                         | -2.535341888   | 1.26E-06 |
| ISCW018477-RA | Adiponectin receptor, putative (Fragment)                        | ISARL      | adiponectin-activated signaling pathway                                                     | -2.75905145    | 3.57E-22 |
| ISCW003837-RA | G2/mitotic-specific cyclin A, putative (Fragment)                | cyclinA    | mitotic cell cycle phase transition; regulation of cyclin-dependent protein kinase activity | -3.145555868   | 1.43E-06 |
| ISCW002566-RA | Acyl-CoA synthetase, putative (Fragment)                         | ACS        | acetate-CoA ligase activity                                                                 | -3.53392918    | 5.23E-05 |

|                   |                                               |            |                                     |              |              |
|-------------------|-----------------------------------------------|------------|-------------------------------------|--------------|--------------|
| ISCW008490<br>-RA | Gamma glutamyl<br>transpeptidase,<br>putative | GGT        | glutathione<br>catabolic<br>process | -5.476120094 | 5.66E-<br>08 |
| ISCW013319<br>-RA | Uncharacterized<br>protein                    | ISCW013319 | N/A                                 | -7.608882724 | 2.05E-<br>07 |
| ISCW009608<br>-RA | Glutathione S-<br>transferase,<br>putative    | GST        | glutathione<br>metabolic<br>process | -7.655953275 | 1.37E-<br>05 |

“-” indicates downregulation of genes in the guts of ds *ISARL*-injected ticks when compared to that in control ds *GFP*-injected tick guts.

**Table S2. Summary of differently expressed genes of comparison between ds *GFP* and ds *ISARL* injection after 96h feeding on *B. burgdorferi*-infected mice.**

| Gene              | Annotation                                                                            | Gene Name  | GO function                                                | Log2FoldChange | P-value  |
|-------------------|---------------------------------------------------------------------------------------|------------|------------------------------------------------------------|----------------|----------|
| ISCW003218<br>-RA | FADdependent oxidoreductase domain-containing protein 2, putative                     | FOXRED2    | ubiquitin-dependent ERAD pathway                           | -2.879056472   | 0.000239 |
| ISCW005667<br>-RA | Secreted protein, putative                                                            | Reeler     | N/A                                                        | -2.678543731   | 0.000119 |
| ISCW003629<br>-RA | Secreted protein, putative                                                            | ISCW003629 | N/A                                                        | -2.426582135   | 0.0001   |
| ISCW018477<br>-RA | Adiponectin receptor, putative (Fragment)                                             | ISARL      | adiponectin-activated signaling pathway                    | -1.912092255   | 1.72E-11 |
| ISCW011292<br>-RA | Cyclic nucleotidebinding domain-containing protein                                    | CNBD       | potassium ion transmembrane transport                      | -1.620397316   | 0.00021  |
| ISCW003135<br>-RA | Cytochrome p450, putative                                                             | CYP        | heme binding; oxidoreductase activity                      | -1.427275425   | 7.35E-05 |
| ISCW001955<br>-RA | AMP dependent CoA ligase, putative                                                    | AMP        | oxidoreductase activity                                    | -1.427082757   | 0.00027  |
| ISCW002185<br>-RA | Uncharacterized protein                                                               | ISCW002185 | N/A                                                        | -1.251407193   | 3.40E-05 |
| ISCW024631<br>-RA | 3-hydroxyacyl-CoA dehydrogenase, putative (Secreted salivary gland peptide, putative) | 3HADH      | fatty acid metabolic process                               | -1.089854316   | 2.66E-05 |
| ISCW013566<br>-RA | Alpha-actinin, putative                                                               | ACTN       | calcium ion binding; protein tyrosine phosphatase activity | -1.051823169   | 4.99E-05 |
| ISCW020505<br>-RA | Uncharacterized protein                                                               | ISCW020505 | oxidoreductase activity                                    | -1.038498406   | 4.11E-05 |
| ISCW019656<br>-RA | Secreted salivary gland peptide, putative (Fragment)                                  | ISCW019656 | N/A                                                        | -1.000151879   | 5.89E-05 |
| ISCW016391<br>-RA | Cytochrome P450, putative                                                             | CYP        | heme binding; oxidoreductase activity                      | -0.983747879   | 0.000348 |
| ISCW006151<br>-RA | Transport protein, putative (Fragment)                                                | ISCW006151 | transmembrane transporter activity                         | -0.869973215   | 1.75E-05 |
| ISCW021203<br>-RA | Uncharacterized protein                                                               | ISCW021203 | N/A                                                        | -0.826491344   | 9.19E-05 |



|                   |                                                                     |            |                                                                             |              |          |
|-------------------|---------------------------------------------------------------------|------------|-----------------------------------------------------------------------------|--------------|----------|
| ISCW024161<br>-RA | Uncharacterized protein                                             | ISCW024161 | N/A                                                                         | -0.753881171 | 4.99E-05 |
| ISCW018609<br>-RA | Hemomucin, putative (Fragment)                                      | Hmu        | biosynthetic process                                                        | -0.730567529 | 0.000361 |
| ISCW017282<br>-RA | Oxodicarboxylate carrier protein, putative                          | ODC        | transmembrane transport                                                     | -0.701243498 | 4.69E-05 |
| ISCW009471<br>-RA | Phospholipase B-like (Fragment)                                     | PLB        | phospholipid catabolic process                                              | -0.694463465 | 8.01E-05 |
| ISCW006150<br>-RA | Sugar transporter, putative                                         | ISCW006150 | carbohydrate transport                                                      | -0.666272429 | 6.70E-05 |
| ISCW012299<br>-RA | Adenylosuccinate synthetase (Fragment)                              | ADSS       | de novo' AMP biosynthetic process; IMP metabolic process                    | -0.649923076 | 0.00038  |
| ISCW022913<br>-RA | cAMP and cAMP-inhibited cGMP 3,5-cyclic phosphodiesterase, putative | PDE        | negative regulation of cGMP-mediated signaling                              | -0.612276289 | 3.11E-06 |
| ISCW000885<br>-RA | Alpha-1,4 glucan phosphorylase                                      | GP         | glycogen catabolic process                                                  | -0.588614232 | 0.000254 |
| ISCW019117<br>-RA | Pyridoxine kinase, putative (Fragment)                              | PDXK       | pyridoxal 5'-phosphate salvage                                              | -0.535676385 | 0.000478 |
| ISCW018543<br>-RA | GMP synthase, putative (Fragment)                                   | GMPS       | glutamine metabolic process; GMP biosynthetic process                       | -0.53194689  | 0.000465 |
| ISCW004028<br>-RA | Phosphatidylserine synthase I, putative                             | PTDSS1     | phosphatidylserine biosynthetic process                                     | -0.529598437 | 3.12E-05 |
| ISCW012521<br>-RA | Uncharacterized protein                                             | ISCW012521 | N/A                                                                         | -0.517853294 | 2.92E-05 |
| ISCW009548<br>-RA | Uncharacterized protein                                             | ISCW009548 | N/A                                                                         | -0.504914087 | 0.000199 |
| ISCW015732<br>-RA | RNA polymerase II transcription elongation factor, putative         | Elongin-C  | ubiquitin-dependent protein catabolic process                               | -0.48942716  | 4.89E-05 |
| ISCW022144<br>-RA | N-CAM Ig domain-containing protein, putative                        | Ncam       | protein serine phosphatase activity; protein threonine phosphatase activity | -0.437192969 | 0.000289 |

|                   |                                       |          |                                                                                                          |              |          |
|-------------------|---------------------------------------|----------|----------------------------------------------------------------------------------------------------------|--------------|----------|
| ISCW009549<br>-RA | Selenoprotein P precursor, putative   | Selenop  | selenium compound metabolic process                                                                      | -0.436460074 | 0.000423 |
| ISCW013692<br>-RA | V-type proton ATPase subunit G        | V-ATPase | proton transmembrane transport                                                                           | -0.414399839 | 0.000311 |
| ISCW010157<br>-RA | Receptor expression-enhancing protein | REEP     | N/A                                                                                                      | -0.405156446 | 0.000104 |
| ISCW023312<br>-RA | Sidoreflexin                          | SFXN     | mitochondrial transmembrane transport; serine import into mitochondrion intracellular protein transport; | -0.3999554   | 0.000229 |
| ISCW006433<br>-RA | AP complex subunit sigma (Fragment)   | APS      | vesicle-mediated transport                                                                               | -0.395796427 | 0.000508 |

“-” indicates downregulation of genes in the guts of ds *ISARL*-injected ticks when compared to that in control ds *GFP*-injected tick guts.

**Table S3. Summary of differently expressed genes of comparison between recombinant *GFP* and adiponectin proteins injection after 8h.**

| Gene          | Annotation                                          | Log2FoldChange | P-value    |
|---------------|-----------------------------------------------------|----------------|------------|
| ISCW004553-RA | Cuticle protein, putative                           | 18.51302808    | 2.05E-12   |
| ISCW002039-RA | Cuticle protein, putative                           | 17.49563794    | 2.29E-07   |
| ISCW001782-RA | Uncharacterized protein                             | 17.27754175    | 7.09E-10   |
| ISCW013798-RA | Cuticle protein, putative                           | 17.20315541    | 7.96E-05   |
| ISCW015495-RA | Secreted protein, putative (Fragment)               | 17.15463748    | 0.00016026 |
| ISCW005191-RA | Secreted glycine rich protein, putative (Fragment)  | 17.11093994    | 2.95E-08   |
| ISCW003789-RA | Uncharacterized protein                             | 16.81877212    | 2.70E-06   |
| ISCW016297-RA | Uncharacterized protein                             | 16.74612219    | 1.13E-06   |
| ISCW008562-RA | Cuticle protein, putative                           | 15.3237752     | 1.02E-06   |
| ISCW002925-RA | Uncharacterized protein                             | 2.857394251    | 1.82E-05   |
| ISCW024478-RA | Secreted cysteine rich protein, putative (Fragment) | 2.851254132    | 1.38E-05   |
| ISCW021558-RA | Secreted salivary gland peptide, putative           | 2.689268024    | 3.51E-05   |
| ISCW021555-RA | Uncharacterized protein                             | 2.656702948    | 4.30E-05   |
| ISCW023547-RA | Secreted salivary gland peptide, putative           | 2.589439049    | 0.0001213  |
| ISCW023623-RA | Serpin-4 precursor, putative (Serpin-4, putative)   | 2.173997552    | 5.42E-05   |
| ISCW008209-RA | Hebreain, putative                                  | 2.158930697    | 1.20E-06   |
| ISCW024733-RA | Beat protein, putative (Fragment)                   | 2.105356324    | 1.12E-05   |
| ISCW024387-RA | Serpin-2 precursor, putative (Fragment)             | 2.00955178     | 5.56E-05   |
| ISCW002113-RA | Antimicrobial peptide microplusin                   | 1.940836315    | 0.00014064 |
| ISCW011893-RA | ANK_REP_REGION domain-containing protein            | 1.808330643    | 1.28E-08   |

|               |                                                   |              |            |
|---------------|---------------------------------------------------|--------------|------------|
| ISCW015113-RA | Uncharacterized protein                           | 1.783621042  | 6.95E-05   |
| ISCW012685-RA | Myosin light chain 1, putative                    | 1.61605594   | 9.51E-05   |
| ISCW005837-RA | Uncharacterized protein                           | 1.582477028  | 3.43E-05   |
| ISCW024686-RA | Ixoderin, putative (Fragment)                     | 1.545371762  | 3.67E-06   |
| ISCW014652-RA | Serpin-8 precursor, putative                      | 1.431124914  | 1.89E-06   |
| ISCW009063-RA | Tropomyosin, putative                             | 1.358977546  | 0.00014404 |
| ISCW023442-RA | Uncharacterized protein                           | 1.288696108  | 0.00015793 |
| ISCW023441-RA | Troponin, putative (Fragment)                     | 1.2703018    | 0.00010777 |
| ISCW016762-RA | LIM domain-containing protein, putative           | 1.268776381  | 6.91E-06   |
| ISCW002637-RA | Reductase, putative                               | 1.195839092  | 5.26E-05   |
| ISCW017459-RA | Glucose-6-phosphatase                             | -1.182920138 | 0.00012321 |
| ISCW015064-RA | Cytochrome P450, putative                         | -1.276584666 | 5.75E-06   |
| ISCW015956-RA | Serine/threonine protein kinase, putative         | -1.438675023 | 1.25E-05   |
| ISCW016390-RA | Cytochrome P450, putative                         | -1.643963635 | 3.32E-06   |
| ISCW016391-RA | Cytochrome P450, putative                         | -1.678990788 | 6.27E-05   |
| ISCW006560-RA | Cytochrome P450, putative                         | -2.209859052 | 1.42E-06   |
| ISCW024348-RA | Salivary HBP family protein, putative (Fragment)  | -3.822772331 | 2.76E-05   |
| ISCW008563-RA | Cuticle protein, putative                         | -14.56782308 | 1.01E-06   |
| ISCW005940-RA | Elongation of very long chain fatty acids protein | -15.77527062 | 7.81E-08   |
| ISCW012372-RA | Cysteine rich secreted peptide, putative          | -17.69968417 | 3.20E-09   |

“-” indicates downregulation of genes in the guts of adiponectin-injected ticks when compared to that in control GFP-injected tick guts.

**Table S4. The primers used in this study.**

| <b>Gene name</b>             | <b>Primer sequence</b>                                                                                                |
|------------------------------|-----------------------------------------------------------------------------------------------------------------------|
| Tick <i>actin</i>            | F: GCGACGTAGCAG<br>R: GGTATCGTGCTCGACTC                                                                               |
| Mouse $\beta$ - <i>actin</i> | F: AGCGGGAAATCGTGCGTG<br>R: CAGGGTACATGGTGGTGCC                                                                       |
| <i>Borrelia flaB</i>         | F: TTCAATCAGGTAACGGCACA<br>R: GACGCRRGAGACCCTGAAAG                                                                    |
| ds <i>GFP</i>                | F:<br>TAATACGACTCACTATAGGGAGAGCGACGTAAACGGCCACAAGT<br>T<br>R: TAATACGACTCACTATAGGGAGACGGGTCTTGTAGTTGCCGTC             |
| ds <i>ISARL</i>              | F: TAATACGACTCACTATAGGGAGAGACGATGACGAGGATGAGC<br>R: TAATACGACTCACTATAGGGAGACGTGTGGAAGGTGAAGGAC                        |
| <i>ISARL</i> qPCR            | F: TGCAGGACAACGACTACCTG<br>R: ACCAGATGTTCCCGGTCTC                                                                     |
| <i>ISARL</i> _pEZ<br>T_Dlux  | F: AGGCGTTCAGTCTAGAATGGAGGTCCGCGAGCGACG<br>R:<br>AGACCGGCGGCCGCTCAAGCGTAATCTGGAACATCGTATGGGTA<br>GTCCAATGGTGGACCCTCCT |
| 3HADH<br>qPCR                | F: GACCCCTGATTGTTATTCTG<br>R: GCCATCCACTTCTTTCTTGA                                                                    |
| ADSS qPCR                    | F: CACCGAGCAGAAGAACGAG<br>R: GAGTAGCGGAGAACCACCAG                                                                     |
| GMPS<br>qPCR                 | F: CACCTTCATCACCCAGGACT<br>R: TCTCGCTCACCATCTTCTTG                                                                    |
| FOXRED2<br>qPCR              | F: CCATCAACAACGACCTCTT<br>R: GGCGTCCTAACTATCTTCAGT                                                                    |
| Reeler<br>qPCR               | F: CCTGGAGGAACCTGAAGAAG<br>R: AATGGCGTGGACGAAGTAAT                                                                    |
| AMP qPCR                     | F: TACCACAACAAGCCACAAGC<br>R: CGATGTAGAACTGCCCACTC                                                                    |
| ODC qPCR                     | F: GTCTCACGGAGGCTGTCTTC<br>R: TACGTGCTACGGCAAAGGTA                                                                    |
| PDE qPCR                     | F: GACGGTGCGAAAGAACTACC<br>R: TTGAATGCTCCTGTGGAATG                                                                    |
| GP qPCR                      | F: GTGGAGATGCGAGAGGAGAT<br>R: GTAGTCCCAGGCGTTGTAGC                                                                    |
| PTDSS1<br>qPCR               | F: ATGGCTTCGGCATCTTCTT<br>R: TCGTGGTCTGAATGTCCTTG                                                                     |
| Ncam qPCR                    | F: GCTGCGGGAGAACTATGTG<br>R: CTTGTTGAGGTGTTGCTGCT                                                                     |
| VATPase<br>qPCR              | F: ATGGCTAGTCAAAGCCAAGG<br>R: CATCGGCGACTTTTTTCAGAC                                                                   |

|                    |                                                                                                                     |
|--------------------|---------------------------------------------------------------------------------------------------------------------|
| ACTN qPCR          | F: ACCGCTACACCCAGTACACC<br>R: TCTCGACCTCGTTGATGTTG                                                                  |
| HMU qPCR           | F: TCGACGCTTACTACGGTGTC<br>R: GTCGTCCAGAAAGAGGATGC                                                                  |
| PLB qPCR           | F: GAATTTTCTCTGGCGACGAC<br>R: AAGAGTTGCCGTTCCCTGT                                                                   |
| PDXK qPCR          | F: CTGAAAGAGGACAACCCTTCA<br>R: GCTCCCTGTAGATGCTCACC                                                                 |
| Selenop qPCR       | F: CAGTGCAAGAACTCCACCA<br>R: AAAGTCTGGACGCCTTCGTA                                                                   |
| SFXN qPCR          | F: TCTCTGCGGTCTTCTGCTC<br>R: CGAACCACCTCCTGAATCTC                                                                   |
| ds <i>3HADH</i>    | F: <i>TAATACGACTCACTATAGGGAGAGTTGCACTCTTTGACGTGGA</i><br>R:<br><i>TAATACGACTCACTATAGGGAGAAGTGGGACGTAGTATGGTGGGA</i> |
| ds <i>PTDSS1</i>   | F: <i>TAATACGACTCACTATAGGGAGACTAGTCAAAAGCCCGACCAC</i><br>R: <i>TAATACGACTCACTATAGGGAGATGACCGCATACTCCTTCTCA</i>      |
| ds <i>ADSS</i>     | F: <i>TAATACGACTCACTATAGGGAGACAGTGGTGAACAGCGTGAA</i><br>R: <i>TAATACGACTCACTATAGGGAGATTGGTGGAAAGTCAAAAACGA</i>      |
| ds <i>GMPS</i>     | F: <i>TAATACGACTCACTATAGGGAGAAAGGACTTCCACAAGGACGA</i><br>R: <i>TAATACGACTCACTATAGGGAGAACACGTACACCACCCTGTTG</i>      |
| ds <i>NCAM</i>     | F: <i>TAATACGACTCACTATAGGGAGAACTTTGGAGGTGCTGGACA</i><br>R:<br><i>TAATACGACTCACTATAGGGAGAAGAGAGTGGCAGACGGAGAC</i>    |
| ds <i>ACTN</i>     | F: <i>TAATACGACTCACTATAGGGAGAATCTGCTGGACTACGGGAAG</i><br>R: <i>TAATACGACTCACTATAGGGAGAGGGTGTGTTGAAGTTGGTCTCC</i>    |
| ds <i>SFXN</i>     | F: <i>TAATACGACTCACTATAGGGAGATTGGGACCAGAGCACCTACT</i><br>R:<br><i>TAATACGACTCACTATAGGGAGAGAAGCGTCCTACCAGAGGAG</i>   |
| ds <i>V-ATPase</i> | F: <i>TAATACGACTCACTATAGGGAGAGAAGCAGGCAAAGGATGAAG</i><br>R: <i>TAATACGACTCACTATAGGGAGAAACGTCAGGAGCTGCTCAAT</i>      |
| ds <i>PSD</i>      | F: <i>TAATACGACTCACTATAGGGAGAGACTACCACCGCTTCCACTC</i><br>R: <i>TAATACGACTCACTATAGGGAGACCTCGAAGATGAGCACCAC</i>       |
| PSD qPCR           | F: GAAGGGCATCACCTACTCC<br>R: CTTCTGCTGGTACTCCTCCTC                                                                  |
| G6P1 qPCR          | F: AGCCTGTCCCGAATCTACA<br>R: CGTTGTCCGTGTCCATCTT                                                                    |
| G6P2 qPCR          | F: TCCATCTATTTCTGGGCTGAT<br>R: GTTCACGTAGGTCGGGTCAT                                                                 |
| PEPCK1 qPCR        | F: CAACACCATTTTCACCAACG<br>R: AGTTTGCCTCCCTTTTCCA                                                                   |
| PEPCK2 qPCR        | F: TTCCA CTGCCAAGTATCG<br>R: GCTCCGTGCTGATGAATGT                                                                    |
| PEPCK3 qPCR        | F: GAGCACAAAGGCAAGGTGA<br>R: TTCCCAGACTCAGCCAATG                                                                    |

|                 |                                                                                                                      |
|-----------------|----------------------------------------------------------------------------------------------------------------------|
| ds <i>G6P1</i>  | F: <i>TAATACGACTCACTATAGGGAGAGCCAGTGCTATGTCCACCT</i><br>R: <i>TAATACGACTCACTATAGGGAGAGAGACGCCCCGATAAAGAC</i>         |
| ds <i>G6P2</i>  | F: <i>TAATACGACTCACTATAGGGAGAAGCACCGACCCTTCTGGTA</i><br>R: <i>TAATACGACTCACTATAGGGAGAGATGACCCCACTGACTACGG</i>        |
| ds <i>C1QL3</i> | F: <i>TAATACGACTCACTATAGGGAGAGAACATGCAGGCAGAAATCA</i><br>R: <i>TAATACGACTCACTATAGGGAGAACGAGAAAGCCCGAGAAAG</i>        |
| C1QL3<br>qPCR   | F: <i>ACGAGAGCCATCACCTCCT</i><br>R: <i>TCCCCTTTCTGCGAATAAGA</i>                                                      |
| C1QL3_pMT       | F: <i>CTCGCTCGGG<u>GAGATCT</u>ATGCAGACCTGGGTTGTTCTTG</i><br>R: <i>GCCCTCTAGACT<u>CTCGAGT</u>ACCGTCCCCTTTCTGCGAAT</i> |

The underlines indicate restriction enzymes sites. The italicized letters indicate T7 promoter sequence.
